# Supplementary material for: GWAS analysis reveals distinct pathogenicity profiles of Australian Parastagonospora nodorum isolates and identification of marker-trait-associations to septoria nodorum blotch
Source: PubMed Central journal article supplement (PMC8115087; doi:10.1038/s41598-021-87829-0), 2021-05-12
Supplement: 41598_2021_87829_MOESM2_ESM.pdf [file 41598_2021_87829_MOESM2_ESM.pdf]

**Supplemental Table S1: Wheat lines used in this study.**

**GWAS analysis reveals distinct pathogenicity profiles of Australian *Parastagonospora nodorum* isolates and identification of marker-trait-associations to septoria nodorum blotch**

Huyen T.T Phan, Eiko Furuki, Lukas Hunziker, Kasia Rybak, Kar-Chun Tan

**Supplementary Table S1: Wheat lines used in this study - CAIGE collection.**

| Qcode     | Collection | GID       | Pedigree                                                                            |
|-----------|------------|-----------|-------------------------------------------------------------------------------------|
| 100:ZIF14 | CAIGE 2016 | 400011823 | QAFZAH-25/4/KAUZ'S'/3/TX62A4793-7/CD809//VEE'S'                                     |
| 100:ZIZ11 | CAIGE 2013 | 4907584   | CHORIZO//GH'S'/ANZA                                                                 |
| 103:ZIF14 | CAIGE 2016 | 400001042 | JAWAHIR-20 (CHECK)                                                                  |
| 104:ZIF14 | CAIGE 2016 | 400011239 | SEKSAKA-6/IZAZ-8                                                                    |
| 105:ZIF14 | CAIGE 2016 | 400011238 | SEKSAKA-6/IZAZ-8                                                                    |
| 105:ZIZ13 | CAIGE 2015 | 400009811 | HAMAM-5/OUKAB-2//TAZA-1                                                             |
| 105:ZWW11 | CAIGE 2013 | 6280059   | EGA BONNIE ROCK/6/CPI8/GEDIZ/3/GOO//ALB/CRA/4/AE.SQUARROSA (208)/5/2*WESTONIA       |
| 106:ZIF14 | CAIGE 2016 | 400011237 | SERI.1B*2/3/KAUZ*2/BOW//KAUZ/4/KAUZ/FLORKWA-1                                       |
| 107:ZIF14 | CAIGE 2016 | 400011236 | SERI.1B*2/3/KAUZ*2/BOW//KAUZ/4/KAUZ/FLORKWA-1                                       |
| 108:ZWB11 | CAIGE 2013 | 6178997   | QUAIU/5/FRET2*2/4/SNI/TRAP#1/3/KAUZ*2/TRAP//KAUZ                                    |
| 10:ZIF14  | CAIGE 2016 | 400011634 | 91-142 a 139//TAM200/KAUZ                                                           |
| 111:ZIZ13 | CAIGE 2015 | 400009030 | ATENA-1/GAMDOW-3/3/MON'S'/ALD'S'//ALDAN'S'/IAS58                                    |
| 115:ZWW11 | CAIGE 2013 | 6280103   | PBW343*2/KUKUNA//WBL1*2/KUKUNA                                                      |
| 121:ZWB11 | CAIGE 2013 | 6174903   | ALTAR 84/AE.SQUARROSA (221)//3*BORL95/3/URES/JUN//KAUZ/4/WBL1/5/MILAN/S87230//BAV92 |
| 122:ZIF14 | CAIGE 2016 | 400011464 | SHUHA-4//NS732/HER/3/TNMU/MILAN                                                     |
| 122:ZWW11 | CAIGE 2013 | 6280144   | D67.2/P66.270//AE.SQUARROSA (320)/3/CUNNINGHAM/4/SKAUZ/BAV92                        |
| 123:ZIF14 | CAIGE 2016 | 400011463 | SHUHA-4//NS732/HER/3/TNMU/MILAN                                                     |
| 123:ZWB14 | CAIGE 2016 | 6692023   | BAVIS/4/MILAN/KAUZ//DHARWAR DRY/3/BAV92                                             |
| 124:ZIF14 | CAIGE 2016 | 400011462 | SHUHA-4//NS732/HER/3/TNMU/MILAN                                                     |
| 124:ZWB11 | CAIGE 2013 | 6177148   | TRCH/6/HPO/TAN//VEE/3/2*PGO/4/MILAN/5/SSERI1                                        |
| 125:ZIF14 | CAIGE 2016 | 400011461 | SHUHA-4//NS732/HER/3/TNMU/MILAN                                                     |
| 126:ZWB11 | CAIGE 2013 | 6177174   | PFAU/SERI.1B//AMAD/3/WAXWING/6/HPO/TAN//VEE/3/2*PGO/4/MILAN/5/SSERI1                |
| 129:ZIF14 | CAIGE 2016 | 400011216 | TEVEE'S'/SHUHA'S'//ICARDA-SRRL-7                                                    |
| 12:ZIZ11  | CAIGE 2013 | 400001765 | VEE/PJN//2*KAUZ/3/PLK70/LIRA'S'//CNO79*2/PRL                                        |
| 135:ZWW11 | CAIGE 2013 | 6280202   | T.DICOCCON PI225332/AE.SQUARROSA (895)//WBL1/3/2*WBL1/4/SOKOLL                      |
| 140:ZWB14 | CAIGE 2016 | 6568597   | MUTUS/2*DANPHE #1                                                                   |
| 151:ZWW11 | CAIGE 2013 | 6280455   | KRICHAUFF/2*PASTOR/4/MILAN/KAUZ//PRINIA/3/BAV92                                     |
| 172:ZWB11 | CAIGE 2013 | 6175216   | WAXWING/4/BL 1496/MILAN/3/CROC_1/AE.SQUARROSA (205)//KAUZ/5/FRNCLN                  |
| 177:ZWW11 | CAIGE 2013 | 6372296   | KRICHAUFF/2*PASTOR//2*SOKOLL                                                        |
| 17:ZWW11  | CAIGE 2013 | 6278849   | H45/4/KRICHAUFF/FINSI/3/URES/PRL//BAV92                                             |
| 182:ZWB11 | CAIGE 2013 | 6175411   | WAXWING*2/HEILO                                                                     |

|           |            |           |                                                                                                       |
|-----------|------------|-----------|-------------------------------------------------------------------------------------------------------|
| 190:ZWB14 | CAIGE 2016 | 6692209   | FALCIN/AE.SQUARROSA (312)/3/THB/CEP7780//SHA4/LIRA/4/FRET2/5/MUU/6/MILAN/KAUZ//DHARWAR<br>DRY/3/BAV92 |
| 194:ZWB14 | CAIGE 2016 | 6691422   | SUNCO.6/FRAME//PASTOR/3/2*ATTILA/PASTOR                                                               |
| 20:ZIF14  | CAIGE 2016 | 400011314 | CAR422/ANA//YACO/3/KAUZ*2/TRAP//KAUZ/4/BUCUR/5/BUCUR                                                  |
| 21:ZIZ11  | CAIGE 2013 | 400002150 | HD2206/HORK'S'/3/2*NS732/HER//KAUZ'S'                                                                 |
| 21:ZWW11  | CAIGE 2013 | 6278940   | VORB/SOKOLL                                                                                           |
| 22:ZWW11  | CAIGE 2013 | 6278942   | VORB/SOKOLL                                                                                           |
| 23:ZWW11  | CAIGE 2013 | 6278943   | VORB/SOKOLL                                                                                           |
| 24:ZIZ11  | CAIGE 2013 | 5755188   | SHA5//CARC/AUK/3/VEE#5//DOBUC'S'                                                                      |
| 24:ZIZ13  | CAIGE 2015 | 400007763 | TINAMOU-2//TEVEE-1/SHUHA-6                                                                            |
| 27:ZIF14  | CAIGE 2016 | 400011494 | DORADE-5/DUNAV                                                                                        |
| 27:ZIZ11  | CAIGE 2013 | 400001172 | FOW-2//BAU/MILAN                                                                                      |
| 284:ZWB13 | CAIGE 2015 | 6691665   | BAVIS*2//ATTILA/PASTOR                                                                                |
| 287:ZWB13 | CAIGE 2015 | 6690931   | SUNCO.6/FRAME//PASTOR/3/ATTILA/PASTOR/4/1447/PASTOR//KRICHAUFF                                        |
| 28:ZIZ11  | CAIGE 2013 | 400000093 | SHUHA-4//NS732/HER                                                                                    |
| 29:ZIZ13  | CAIGE 2015 | 400007826 | NESSER/SERI//TEVEE-1/SHUHA-6                                                                          |
| 30:ZIZ11  | CAIGE 2013 | 5791390   | SHUHA-2/FOW-2                                                                                         |
| 32:ZIZ13  | CAIGE 2015 | 400008588 | KARAWAN-1/TALLO 3//JADIDA-2                                                                           |
| 334:ZWB13 | CAIGE 2015 | 6692306   | SOKOLL/3/PASTOR//HXL7573/2*BAU/4/PARUS/PASTOR                                                         |
| 33:ZIZ11  | CAIGE 2013 | 400001814 | FOW-2/PASTOR-2                                                                                        |
| 34:ZWW11  | CAIGE 2013 | 6279212   | STYLET/4/SLVS/3/CROC_1/AE.SQUARROSA (224)//OPATA                                                      |
| 37:ZIZ11  | CAIGE 2013 | 400002091 | NS732/HER//ARRIHANE/3/REGGRAG-1                                                                       |
| 38:ZIZ11  | CAIGE 2013 | 400002090 | NS732/HER//ARRIHANE/3/REGGRAG-1                                                                       |
| 42:ZIZ11  | CAIGE 2013 | 400002026 | ACHTAR*3//KANZ/KS85-8-4/3/ZEMAMRA-5                                                                   |
| 43:ZIF14  | CAIGE 2016 | 400011629 | IZAZ-2/3/ATTILA//VEE#5/DOBUC'S'/4/BOW #1/FENGGANG 15                                                  |
| 44:ZIZ13  | CAIGE 2015 | 400008575 | TEVEE-1/STAR'S'/3/ACHTAR*3//KANZ/KS85-8-4                                                             |
| 45:ZIZ11  | CAIGE 2013 | 400002141 | GARIBE//TURACO/CHIL/3/KATILA-11                                                                       |
| 45:ZIZ13  | CAIGE 2015 | 400009700 | SHUHA-7/SHUHA-14//MARHOUC*4/SAADA                                                                     |
| 46:ZIF14  | CAIGE 2016 | 400011290 | JAWAHIR-1/3/PASTOR/SERI//PFAU                                                                         |
| 47:ZIF14  | CAIGE 2016 | 400011289 | JAWAHIR-1/3/PASTOR/SERI//PFAU                                                                         |
| 48:ZIF14  | CAIGE 2016 | 400011288 | JAWAHIR-1/3/PASTOR/SERI//PFAU                                                                         |
| 48:ZIZ11  | CAIGE 2013 | 400001980 | SISABAN-3                                                                                             |
| 49:ZIF14  | CAIGE 2016 | 400011287 | JAWAHIR-1/3/PASTOR/SERI//PFAU                                                                         |
| 4:ZIZ11   | CAIGE 2013 | 400001771 | MILAN/SHA7/3/NS732/HER//SUDAN #11                                                                     |

|          |            |           |                                                                                                                                          |
|----------|------------|-----------|------------------------------------------------------------------------------------------------------------------------------------------|
| 51:ZIF14 | CAIGE 2016 | 400011285 | JAWAHIR-1/3/PASTOR/SERI//PFAU                                                                                                            |
| 52:ZIF14 | CAIGE 2016 | 400011284 | JAWAHIR-1/3/PASTOR/SERI//PFAU                                                                                                            |
| 52:ZWW11 | CAIGE 2013 | 6279585   | INQALAB 91*2/KUKUNA/4/TC14/2*HTG//DUCULA/3/PRINIA                                                                                        |
| 55:ZIF14 | CAIGE 2016 | 400011281 | JAWAHIR-1/GIRWILL-5                                                                                                                      |
| 55:ZIZ11 | CAIGE 2013 | -         | WON-D 75/SHUHA-4                                                                                                                         |
| 56:ZIZ13 | CAIGE 2015 | 400002868 | CHAM-4/SHUHA'S'/6/2*SAKER/5/RBS/ANZA/3/KVZ/HYS//YMH/TOB/4/BOW'S'                                                                         |
| 56:ZWB11 | CAIGE 2013 | 6176308   | ATTILA*2/PBW65*2//MURGA                                                                                                                  |
| 56:ZWB13 | CAIGE 2015 | 6681871   | CHONTE//KIRITATI/2*TRCH                                                                                                                  |
| 59:ZIF14 | CAIGE 2016 | 400011278 | JAWAHIR-1/GIRWILL-5                                                                                                                      |
| 60:ZIF14 | CAIGE 2016 | 400011277 | JAWAHIR-1/GIRWILL-5                                                                                                                      |
| 61:ZIF14 | CAIGE 2016 | 400011276 | JAWAHIR-1/GIRWILL-5                                                                                                                      |
| 61:ZIZ11 | CAIGE 2013 | 400002072 | GOUBARA-1/HAAMA-1                                                                                                                        |
| 62:ZWB14 | CAIGE 2016 | 6565889   | WBLL1*2/KURUKU//TACUPETO F2001*2/BRAMBLING                                                                                               |
| 63:ZWB14 | CAIGE 2016 | 6680725   | QUAIU #1/BECARD                                                                                                                          |
| 64:ZIZ11 | CAIGE 2013 | 400002149 | DIYAR-7                                                                                                                                  |
| 66:ZIF14 | CAIGE 2016 | 400011738 | J15418/MARAS//SHARK/F4105W2.1                                                                                                            |
| 66:ZWB11 | CAIGE 2013 | 6176409   | ATTILA*2/PBW65*2//W485/HD29                                                                                                              |
| 6:ZIZ11  | CAIGE 2013 | 400001994 | MAYON'S'//CROW'S'/VEE'S'/3/NS732/HER                                                                                                     |
| 71:ZIZ11 | CAIGE 2013 | 400002058 | HAALA-37                                                                                                                                 |
| 76:ZIZ11 | CAIGE 2013 | 400002188 | AAFAQ-2                                                                                                                                  |
| 79:ZWB14 | CAIGE 2016 | 6680917   | BABAX/LR42//BABAX*2/3/PAVON 7S3, +LR47/4/ND643/2*WBLL1/5/BABAX/LR42//BABAX*2/3/PAVON 7S3, +LR47                                          |
| 7:ZIF14  | CAIGE 2016 | 400011743 | 4WON-IR-257/5/YMH/HYS//HYS/TUR3055/3/DGA /4/ VPM / MOS                                                                                   |
| 80:ZIF14 | CAIGE 2016 | 400011259 | KS85W663-2-4/3/VONA/W76-1141//THUNDERBIRD/6/JUP/4/CLLF/3/II14 53/ODIN//CI134431 /SEL 6425<br>/WA00477*2/5/CROC-1/AE.SQUARROSA (213)//PGO |
| 80:ZWB11 | CAIGE 2013 | 6176558   | ATTILA*2/PBW65*2/4/BOW/NKT//CBRD/3/CBRD                                                                                                  |
| 82:ZIF14 | CAIGE 2016 | 400011624 | MON'S'/ALD'S'//TOWPE'S'/3/ZAIEM-10                                                                                                       |
| 85:ZIZ11 | CAIGE 2013 | 400002178 | WAHEED-1                                                                                                                                 |
| 88:ZIF14 | CAIGE 2016 | 400011473 | NS-307/87-461 a 63-690                                                                                                                   |
| 8:ZIF14  | CAIGE 2016 | 400011829 | 88ZHONG218//CTK/VEE/3/KVZ/GV//PR/4/KRASNOVODOPADSKAYA25/5/KS82117/MLT                                                                    |
| 90:ZIF14 | CAIGE 2016 | 400011250 | OPATA/RAYON//KAUZ/3/PFAU/MILAN                                                                                                           |
| 91:ZIZ13 | CAIGE 2015 | 400007830 | KAUZ//TRAP#1/BOW/3/QAFZAH-21                                                                                                             |
| 95:ZIF14 | CAIGE 2016 | 400011471 | PBW343*2/KUKUN//22SAWSN - 97                                                                                                             |
| 95:ZWB11 | CAIGE 2013 | 6176914   | MUNAL #1/FRANCOLIN #1                                                                                                                    |
| 96:ZIF14 | CAIGE 2016 | 400011470 | PBW343*2/KUKUN//22SAWSN - 97                                                                                                             |

|          |            |         |                                                                                          |
|----------|------------|---------|------------------------------------------------------------------------------------------|
| 96:ZWB11 | CAIGE 2013 | 6177828 | FRNCLN/ROLF07                                                                            |
| 97:ZIF14 | CAIGE 2016 | 4874402 | PLK/LIRA/5/NAI60/3/14.53/ODIN//[CI13441]/4/GRK79/6/MNCH/7/CROC_1/AE.SQUARROSA (213)//PGO |

---

**Supplementary Table S1: Wheat lines used in this study - Vavilov collection.**

| <b>Qcode</b> | <b>Year of registration in VIR</b> | <b>Origin Country</b> |
|--------------|------------------------------------|-----------------------|
| WLA-005      | -                                  | -                     |
| WLA-006      | -                                  | -                     |
| WLA-009      | -                                  | -                     |
| WLA-016      | -                                  | -                     |
| WLA-018      | 1958                               | Kazakhstan            |
| WLA-104      | 1978                               | Russia                |
| WLA-107      | 1977                               | Russia                |
| WLA-110      | 1978                               | Russia                |
| WLA-111      | 1977                               | Russia                |
| WLA-115      | -                                  | Azerbaijan            |
| WLA-118      | -                                  | Russia                |
| WLA-124      | -                                  | Russia                |
| WLA-125      | -                                  | Russia                |
| WLA-135      | 1924                               | Russia                |
| WLA-140      | -                                  | -                     |
| WLA-143      | 1941                               | USA                   |
| WLA-168      | -                                  | -                     |
| WLA-170      | -                                  | -                     |
| WLA-187      | -                                  | -                     |
| WLA-222      | 1989                               | Russia                |
| WLA-223      | 1977                               | Kazakhstan            |
| WLA-234      | -                                  | Armenia               |
| WLA-235      | -                                  | Kyrgyzstan            |
| WLA-242      | -                                  | Russia                |
| WLA-259      | -                                  | -                     |
| WLA-266      | -                                  | Sweden                |
| WLA-268      | -                                  | -                     |
| WLA-270      | -                                  | -                     |
| WLA-277      | 1933                               | Kazakhstan            |
| WLA-293      | -                                  | Ukraine               |
| WLA-294      | 1928                               | USA                   |

|         |      |        |
|---------|------|--------|
| WLA-301 | 1978 | Russia |
| WLA-303 | 1986 | Russia |
| WLA-304 | 1990 | Russia |
| WLA-311 | 1930 | China  |

---
