# Supplementary material for: GWAS analysis reveals distinct pathogenicity profiles of Australian Parastagonospora nodorum isolates and identification of marker-trait-associations to septoria nodorum blotch
Source: PubMed Central journal article supplement (PMC8115087; doi:10.1038/s41598-021-87829-0), 2021-05-12
Supplement: 41598_2021_87829_MOESM3_ESM.pdf [file 41598_2021_87829_MOESM3_ESM.pdf]

**Supplemental Table S2: List of genes in the candidate regions spanning the SNB resistance QTLs and their functional annotations.**

**GWAS analysis reveals distinct pathogenicity profiles of Australian *Parastagonospora nodorum* isolates and identification of marker-trait-associations to septoria nodorum blotch**

Huyen T.T Phan, Eiko Furuki, Lukas Hunziker, Kasia Rybak, Kar-Chun Tan

**Table S2: List of genes in the candidate regions spanning the SNB resistance QTLs and their functional annotations.**

| Chromosome | Most significant SNP | Gene Id                                        | Transcript                                                                                                                              | Description                                    | Interpro Description                                                                                                                                                                                                                                                                                                                                                             |
|------------|----------------------|------------------------------------------------|-----------------------------------------------------------------------------------------------------------------------------------------|------------------------------------------------|----------------------------------------------------------------------------------------------------------------------------------------------------------------------------------------------------------------------------------------------------------------------------------------------------------------------------------------------------------------------------------|
| 1B         | AX.94950274          | TraesCS1B02G339800                             | TraesCS1B02G339800.1                                                                                                                    |                                                | IPR032675:Leucine-rich repeat domain superfamily                                                                                                                                                                                                                                                                                                                                 |
|            |                      | TraesCS1B02G340000                             | TraesCS1B02G340000.1                                                                                                                    |                                                | IPR001002:Chitin-binding, type 1 IPR018371:Chitin-binding, type 1, conserved site                                                                                                                                                                                                                                                                                                |
|            |                      | TraesCS1B02G340200                             | TraesCS1B02G340200.1                                                                                                                    | Agglutinin isolectin 3 (WGA3) (Fragment)       | IPR036861:Endochitinase-like superfamily                                                                                                                                                                                                                                                                                                                                         |
|            | AX.94694976          | TraesCS1D02G009406                             | TraesCS1D02G009406.1                                                                                                                    | Powdery mildew resistance protein (Fragment)   | IPR001002:Chitin-binding, type 1 IPR018371:Chitin-binding, type 1, conserved site                                                                                                                                                                                                                                                                                                |
|            |                      | TraesCS1D02G009443                             | TraesCS1D02G009443.1                                                                                                                    | Powdery mildew resistance protein PM3 variant  | IPR036861:Endochitinase-like superfamily                                                                                                                                                                                                                                                                                                                                         |
|            |                      | TraesCS1D02G009800                             | TraesCS1D02G009800.1                                                                                                                    | Protein DETOXIFICATION                         | IPR032675:Leucine-rich repeat domain superfamily                                                                                                                                                                                                                                                                                                                                 |
|            |                      | TraesCS1D02G010000                             | TraesCS1D02G010000.1                                                                                                                    |                                                | IPR002182:NB-ARC IPR027417:P-loop containing nucleoside triphosphate hydrolase                                                                                                                                                                                                                                                                                                   |
|            |                      | TraesCS1D02G010000                             | TraesCS1D02G010000.2                                                                                                                    |                                                | IPR002528:Multi antimicrobial extrusion protein                                                                                                                                                                                                                                                                                                                                  |
|            |                      | TraesCS1D02G010100                             | TraesCS1D02G010100.1                                                                                                                    |                                                | IPR018865:Serine-threonine protein kinase 19                                                                                                                                                                                                                                                                                                                                     |
|            |                      | TraesCS1D02G010800                             | TraesCS1D02G010800.1                                                                                                                    |                                                | IPR018865:Serine-threonine protein kinase 19                                                                                                                                                                                                                                                                                                                                     |
|            |                      | TraesCS1D02G010900                             | TraesCS1D02G010900.1                                                                                                                    | Serine/threonine-protein kinase                | IPR000719:Protein kinase domain IPR000742:EGF-like domain IPR001881:EGF-like calcium-binding domain IPR008271:Serine/threonine-protein kinase, active site IPR011009:Protein kinase-like domain superfamily IPR017441:Protein kinase, ATP binding site IPR018097:EGF-like calcium-binding, conserved site IPR025287:Wall-associated receptor kinase, galacturonan-binding domain |
|            |                      | TraesCS1D02G011200                             | TraesCS1D02G011200.1                                                                                                                    |                                                | IPR001611:Leucine-rich repeat IPR013210:Leucine-rich repeat-containing N-terminal, plant-type                                                                                                                                                                                                                                                                                    |
|            |                      | TraesCS1D02G011400                             | TraesCS1D02G011400.1                                                                                                                    |                                                | IPR032675:Leucine-rich repeat domain superfamily                                                                                                                                                                                                                                                                                                                                 |
|            |                      | TraesCS1D02G012200                             | TraesCS1D02G012200.1                                                                                                                    |                                                | IPR000719:Protein kinase domain IPR000858:S-locus glycoprotein domain IPR001480:Bulb-type lectin domain IPR003609:PAN/Apple domain IPR008271:Serine/threonine-protein kinase, active site                                                                                                                                                                                        |
|            |                      | TraesCS1D02G012800                             | TraesCS1D02G012800.1                                                                                                                    |                                                | IPR011009:Protein kinase-like domain superfamily IPR017441:Protein kinase, ATP binding site IPR024171:S-receptor-like serine/threonine-protein kinase IPR036426:Bulb-type lectin domain superfamily                                                                                                                                                                              |
|            |                      | TraesCS1D02G012900                             | TraesCS1D02G012900.1                                                                                                                    | Serine/threonine-protein kinase                | IPR000719:Protein kinase domain IPR000858:S-locus glycoprotein domain IPR001480:Bulb-type lectin domain IPR003609:PAN/Apple domain IPR008271:Serine/threonine-protein kinase, active site                                                                                                                                                                                        |
|            |                      |                                                |                                                                                                                                         | [Source:UniProtKB/TrEMBL;Accession:A0A1D5T4S3] | IPR011009:Protein kinase-like domain superfamily IPR017441:Protein kinase, ATP binding site IPR024171:S-receptor-like serine/threonine-protein kinase IPR036426:Bulb-type lectin domain superfamily                                                                                                                                                                              |
|            |                      |                                                |                                                                                                                                         | [Source:UniProtKB/TrEMBL;Accession:A0A1D5T1A8] | IPR002182:NB-ARC IPR027417:P-loop containing nucleoside triphosphate hydrolase                                                                                                                                                                                                                                                                                                   |
|            |                      | [Source:UniProtKB/TrEMBL;Accession:A0A1D5T2E8] | IPR032675:Leucine-rich repeat domain superfamily IPR038005:Virus X resistance protein-like, coiled-coil domain IPR041118:Rx, N-terminal |                                                |                                                                                                                                                                                                                                                                                                                                                                                  |

|  |  |                                                                                                                                  |                                                                                                                                                                                                                                                                                                                                                                                                           |
|--|--|----------------------------------------------------------------------------------------------------------------------------------|-----------------------------------------------------------------------------------------------------------------------------------------------------------------------------------------------------------------------------------------------------------------------------------------------------------------------------------------------------------------------------------------------------------|
|  |  | Tubulin-folding cofactor E<br>[Source:Projected from<br>Arabidopsis thaliana<br>(AT1G71440) UniProtKB/Swiss-<br>Prot;Acc:Q8GRL7] | IPR001611:Leucine-rich repeat domain superfamily IPR003591:Leucine-rich repeat, typical subtype IPR029071:Ubiquitin-like repeat domain superfamily IPR032675:Leucine-rich repeat domain superfamily                                                                                                                                                                                                       |
|  |  | Serine/threonine-protein kinase<br>[Source:UniProtKB/TrEMBL;A<br>cc:A0A1D5T2M5]                                                  | IPR000719:Protein kinase domain IPR000858:S-locus glycoprotein domain IPR001480:Bulb-type lectin domain IPR003609:PAN/Apple domain IPR008271:Serine/threonine-protein kinase, active site IPR011009:Protein kinase-like domain superfamily IPR017441:Protein kinase, ATP binding site IPR024171:S-receptor-like serine/threonine-protein kinase superfamily IPR036426:Bulb-type lectin domain superfamily |
|  |  |                                                                                                                                  | IPR011009:Protein kinase-like domain superfamily                                                                                                                                                                                                                                                                                                                                                          |
|  |  |                                                                                                                                  | IPR000719:Protein kinase domain IPR003609:PAN/Apple domain IPR008271:Serine/threonine-protein kinase, active site IPR011009:Protein kinase-like domain superfamily IPR017441:Protein kinase, ATP binding site                                                                                                                                                                                             |
|  |  |                                                                                                                                  | IPR002182:NB-ARC IPR027417:P-loop containing nucleoside triphosphate hydrolase                                                                                                                                                                                                                                                                                                                            |
|  |  |                                                                                                                                  | IPR032675:Leucine-rich repeat domain superfamily IPR038005:Virus X resistance protein-like, coiled-coil domain IPR041118:Rx, N-terminal                                                                                                                                                                                                                                                                   |
|  |  |                                                                                                                                  | IPR032675:Leucine-rich repeat domain superfamily                                                                                                                                                                                                                                                                                                                                                          |
|  |  | Receptor-like kinase 2<br>[Source:UniProtKB/TrEMBL;A<br>cc:D0QEJ4] Receptor-like<br>kinase 2                                     | IPR000719:Protein kinase domain IPR008271:Serine/threonine-protein kinase, active site IPR011009:Protein kinase-like domain superfamily IPR017441:Protein kinase, ATP binding site                                                                                                                                                                                                                        |
|  |  |                                                                                                                                  | IPR000719:Protein kinase domain IPR008271:Serine/threonine-protein kinase, active site IPR011009:Protein kinase-like domain superfamily IPR017441:Protein kinase, ATP binding site                                                                                                                                                                                                                        |
|  |  |                                                                                                                                  | IPR002182:NB-ARC IPR027417:P-loop containing nucleoside triphosphate hydrolase                                                                                                                                                                                                                                                                                                                            |
|  |  |                                                                                                                                  | IPR002182:NB-ARC IPR027417:P-loop containing nucleoside triphosphate hydrolase                                                                                                                                                                                                                                                                                                                            |
|  |  |                                                                                                                                  | IPR032675:Leucine-rich repeat domain superfamily IPR038005:Virus X resistance protein-like, coiled-coil domain IPR041118:Rx, N-terminal                                                                                                                                                                                                                                                                   |
|  |  |                                                                                                                                  | IPR000719:Protein kinase domain IPR008271:Serine/threonine-protein kinase, active site IPR011009:Protein kinase-like domain superfamily IPR017441:Protein kinase, ATP binding site                                                                                                                                                                                                                        |
|  |  |                                                                                                                                  | IPR000719:Protein kinase domain IPR008271:Serine/threonine-protein kinase, active site IPR011009:Protein kinase-like domain superfamily IPR017441:Protein kinase, ATP binding site                                                                                                                                                                                                                        |
|  |  |                                                                                                                                  | IPR000719:Protein kinase domain IPR008271:Serine/threonine-protein kinase, active site IPR011009:Protein kinase-like domain superfamily IPR017441:Protein kinase, ATP binding site                                                                                                                                                                                                                        |
|  |  | LRR14<br>[Source:UniProtKB/TrEMBL;A<br>cc:Q9ATQ3] LRR14                                                                          | IPR002182:NB-ARC IPR027417:P-loop containing nucleoside triphosphate hydrolase IPR032675:Leucine-rich repeat domain superfamily IPR038005:Virus X resistance protein-like, coiled-coil domain IPR041118:Rx, N-terminal                                                                                                                                                                                    |
|  |  |                                                                                                                                  | IPR002182:NB-ARC IPR027417:P-loop containing nucleoside triphosphate hydrolase                                                                                                                                                                                                                                                                                                                            |
|  |  |                                                                                                                                  | IPR032675:Leucine-rich repeat domain superfamily IPR038005:Virus X resistance protein-like, coiled-coil domain IPR041118:Rx, N-terminal                                                                                                                                                                                                                                                                   |
|  |  |                                                                                                                                  | IPR001611:Leucine-rich repeat IPR032675:Leucine-rich repeat domain superfamily                                                                                                                                                                                                                                                                                                                            |

1D

|                    |                      |                                      |                                                                                                                                                                                                                                                         |
|--------------------|----------------------|--------------------------------------|---------------------------------------------------------------------------------------------------------------------------------------------------------------------------------------------------------------------------------------------------------|
| TraesCS1D02G016900 | TraesCS1D02G016900.1 |                                      | IPR002182:NB-ARC IPR027417:P-loop containing nucleoside triphosphate hydrolase<br>IPR032675:Leucine-rich repeat domain superfamily IPR038005:Virus X resistance protein-like, coiled-coil domain IPR041118:Rx, N-terminal                               |
|                    |                      | Putative non-tir-NBS-LRR             |                                                                                                                                                                                                                                                         |
| TraesCS1D02G016983 | TraesCS1D02G016983.1 | resistance gene analog<br>(Fragment) | IPR002182:NB-ARC IPR027417:P-loop containing nucleoside triphosphate hydrolase                                                                                                                                                                          |
| TraesCS1D02G017400 | TraesCS1D02G017400.1 |                                      | IPR002182:NB-ARC IPR027417:P-loop containing nucleoside triphosphate hydrolase<br>IPR032675:Leucine-rich repeat domain superfamily IPR038005:Virus X resistance protein-like, coiled-coil domain IPR041118:Rx, N-terminal                               |
| TraesCS1D02G017600 | TraesCS1D02G017600.1 |                                      | IPR002182:NB-ARC IPR027417:P-loop containing nucleoside triphosphate hydrolase<br>IPR032675:Leucine-rich repeat domain superfamily IPR038005:Virus X resistance protein-like, coiled-coil domain IPR041118:Rx, N-terminal                               |
| TraesCS1D02G017700 | TraesCS1D02G017700.1 |                                      | IPR000719:Protein kinase domain IPR008271:Serine/threonine-protein kinase, active site<br>IPR011009:Protein kinase-like domain superfamily IPR017441:Protein kinase, ATP binding site                                                                   |
| TraesCS1D02G017800 | TraesCS1D02G017800.1 |                                      | IPR000719:Protein kinase domain IPR008271:Serine/threonine-protein kinase, active site<br>IPR011009:Protein kinase-like domain superfamily IPR017441:Protein kinase, ATP binding site                                                                   |
| TraesCS1D02G017900 | TraesCS1D02G017900.1 |                                      | IPR000719:Protein kinase domain IPR008271:Serine/threonine-protein kinase, active site<br>IPR011009:Protein kinase-like domain superfamily IPR017441:Protein kinase, ATP binding site                                                                   |
| TraesCS1D02G018000 | TraesCS1D02G018000.2 |                                      | IPR000719:Protein kinase domain IPR001245:Serine-threonine/tyrosine-protein kinase, catalytic domain IPR011009:Protein kinase-like domain superfamily IPR017441:Protein kinase, ATP binding site<br>IPR020635:Tyrosine-protein kinase, catalytic domain |
| TraesCS1D02G018000 | TraesCS1D02G018000.1 |                                      | IPR000719:Protein kinase domain IPR008271:Serine/threonine-protein kinase, active site<br>IPR011009:Protein kinase-like domain superfamily                                                                                                              |
| TraesCS1D02G018700 | TraesCS1D02G018700.2 |                                      | IPR002182:NB-ARC IPR027417:P-loop containing nucleoside triphosphate hydrolase IPR041118:Rx, N-terminal                                                                                                                                                 |
| TraesCS1D02G018700 | TraesCS1D02G018700.1 |                                      | IPR002182:NB-ARC IPR027417:P-loop containing nucleoside triphosphate hydrolase IPR041118:Rx, N-terminal                                                                                                                                                 |
| TraesCS1D02G018800 | TraesCS1D02G018800.1 |                                      | IPR002182:NB-ARC IPR027417:P-loop containing nucleoside triphosphate hydrolase<br>IPR032675:Leucine-rich repeat domain superfamily                                                                                                                      |
| TraesCS1D02G019400 | TraesCS1D02G019400.1 |                                      | IPR001128:Cytochrome P450 IPR002401:Cytochrome P450, E-class, group I IPR017972:Cytochrome P450, conserved site IPR036396:Cytochrome P450 superfamily                                                                                                   |
| TraesCS1D02G019600 | TraesCS1D02G019600.1 | Name: Lr10                           | IPR032675:Leucine-rich repeat domain superfamily                                                                                                                                                                                                        |
| TraesCS1D02G019700 | TraesCS1D02G019700.1 |                                      | IPR002182:NB-ARC IPR027417:P-loop containing nucleoside triphosphate hydrolase<br>IPR032675:Leucine-rich repeat domain superfamily IPR038005:Virus X resistance protein-like, coiled-coil domain IPR041118:Rx, N-terminal                               |
| TraesCS1D02G020400 | TraesCS1D02G020400.1 |                                      | IPR001128:Cytochrome P450 IPR002401:Cytochrome P450, E-class, group I IPR017972:Cytochrome P450, conserved site IPR036396:Cytochrome P450 superfamily                                                                                                   |
| TraesCS1D02G020619 | TraesCS1D02G020619.1 |                                      | IPR032675:Leucine-rich repeat domain superfamily                                                                                                                                                                                                        |
| TraesCS1D02G021000 | TraesCS1D02G021000.1 |                                      | IPR002182:NB-ARC IPR027417:P-loop containing nucleoside triphosphate hydrolase IPR038005:Virus X resistance protein-like, coiled-coil domain IPR041118:Rx, N-terminal                                                                                   |
| TraesCS1D02G021200 | TraesCS1D02G021200.1 |                                      | IPR002182:NB-ARC IPR027417:P-loop containing nucleoside triphosphate hydrolase                                                                                                                                                                          |
| TraesCS1D02G022600 | TraesCS1D02G022600.1 |                                      | IPR001128:Cytochrome P450 IPR002401:Cytochrome P450, E-class, group I IPR017972:Cytochrome P450, conserved site IPR036396:Cytochrome P450 superfamily                                                                                                   |

|             |                    |                      |                                                                                                                                                                                                                                                                                                                                                                          |
|-------------|--------------------|----------------------|--------------------------------------------------------------------------------------------------------------------------------------------------------------------------------------------------------------------------------------------------------------------------------------------------------------------------------------------------------------------------|
|             | TraesCS1D02G023000 | TraesCS1D02G023000.1 | IPR001611:Leucine-rich repeat IPR003591:Leucine-rich repeat, typical subtype IPR032675:Leucine-rich repeat domain superfamily                                                                                                                                                                                                                                            |
|             | TraesCS1D02G023100 | TraesCS1D02G023100.1 | IPR003591:Leucine-rich repeat, typical subtype IPR032675:Leucine-rich repeat domain superfamily                                                                                                                                                                                                                                                                          |
| AX.95253275 | TraesCS1D02G146700 | TraesCS1D02G146700.1 | IPR000719:Protein kinase domain IPR001611:Leucine-rich repeat IPR003591:Leucine-rich repeat, typical subtype IPR008266:Tyrosine-protein kinase, active site IPR011009:Protein kinase-like domain superfamily IPR013210:Leucine-rich repeat-containing N-terminal, plant-type IPR017441:Protein kinase, ATP binding site IPR032675:Leucine-rich repeat domain superfamily |
| 1D          | TraesCS1D02G146800 | TraesCS1D02G146800.1 | IPR000719:Protein kinase domain IPR001611:Leucine-rich repeat IPR003591:Leucine-rich repeat, typical subtype IPR008266:Tyrosine-protein kinase, active site IPR011009:Protein kinase-like domain superfamily IPR013210:Leucine-rich repeat-containing N-terminal, plant-type IPR017441:Protein kinase, ATP binding site IPR032675:Leucine-rich repeat domain superfamily |
|             | TraesCS1D02G146900 | TraesCS1D02G146900.1 | IPR000719:Protein kinase domain IPR001611:Leucine-rich repeat IPR003591:Leucine-rich repeat, typical subtype IPR008266:Tyrosine-protein kinase, active site IPR011009:Protein kinase-like domain superfamily IPR013210:Leucine-rich repeat-containing N-terminal, plant-type IPR017441:Protein kinase, ATP binding site IPR032675:Leucine-rich repeat domain superfamily |
|             | TraesCS1D02G149200 | TraesCS1D02G149200.1 | IPR002182:NB-ARC IPR027417:P-loop containing nucleoside triphosphate hydrolase                                                                                                                                                                                                                                                                                           |
| AX.94723571 | TraesCS1D02G264600 | TraesCS1D02G264600.1 | IPR032675:Leucine-rich repeat domain superfamily                                                                                                                                                                                                                                                                                                                         |
|             | TraesCS1D02G264800 | TraesCS1D02G264800.1 | IPR000719:Protein kinase domain IPR008271:Serine/threonine-protein kinase, active site IPR011009:Protein kinase-like domain superfamily IPR017441:Protein kinase, ATP binding site                                                                                                                                                                                       |
|             | TraesCS1D02G265100 | TraesCS1D02G265100.1 | IPR001128:Cytochrome P450 IPR002401:Cytochrome P450, E-class, group I IPR017972:Cytochrome P450, conserved site IPR036396:Cytochrome P450 superfamily                                                                                                                                                                                                                    |
|             | TraesCS1D02G265200 | TraesCS1D02G265200.2 | IPR001611:Leucine-rich repeat IPR006553:Leucine-rich repeat, cysteine-containing subtype IPR032675:Leucine-rich repeat domain superfamily                                                                                                                                                                                                                                |
| 1D          | TraesCS1D02G265200 | TraesCS1D02G265200.4 | IPR011009:Protein kinase-like domain superfamily IPR015275:Actin-fragmin kinase, catalytic domain IPR035010:Dual specificity protein phosphatase PHS1 IPR036940:Phosphatidylinositol 3-/4-kinase, catalytic domain superfamily                                                                                                                                           |
|             | TraesCS1D02G265200 | TraesCS1D02G265200.1 | IPR011009:Protein kinase-like domain superfamily IPR015275:Actin-fragmin kinase, catalytic domain IPR035010:Dual specificity protein phosphatase PHS1 IPR036940:Phosphatidylinositol 3-/4-kinase, catalytic domain superfamily                                                                                                                                           |
|             | TraesCS1D02G265200 | TraesCS1D02G265200.3 | IPR029021:Protein-tyrosine phosphatase-like IPR035010:Dual specificity protein phosphatase PHS1 IPR036940:Phosphatidylinositol 3-/4-kinase, catalytic domain superfamily                                                                                                                                                                                                 |
|             | TraesCS1D02G267200 | TraesCS1D02G267200.1 | IPR011009:Protein kinase-like domain superfamily IPR015275:Actin-fragmin kinase, catalytic domain IPR035010:Dual specificity protein phosphatase PHS1 IPR036940:Phosphatidylinositol 3-/4-kinase, catalytic domain superfamily                                                                                                                                           |
|             | TraesCS1D02G268400 | TraesCS1D02G268400.1 | IPR002182:NB-ARC IPR027417:P-loop containing nucleoside triphosphate hydrolase                                                                                                                                                                                                                                                                                           |
|             |                    |                      | IPR032675:Leucine-rich repeat domain superfamily                                                                                                                                                                                                                                                                                                                         |
|             |                    |                      | IPR001810:F-box domain IPR006566:FBD domain IPR032675:Leucine-rich repeat domain superfamily                                                                                                                                                                                                                                                                             |
|             |                    |                      | IPR036047:F-box-like domain superfamily                                                                                                                                                                                                                                                                                                                                  |

2A

|             |                    |                      |                                                                                                                                                                                                                                                                                                                                                                      |
|-------------|--------------------|----------------------|----------------------------------------------------------------------------------------------------------------------------------------------------------------------------------------------------------------------------------------------------------------------------------------------------------------------------------------------------------------------|
| AX.95632742 | TraesCS2A02G418200 | TraesCS2A02G418200.1 | IPR000719:Protein kinase domain IPR006311:Twin-arginine translocation pathway, signal sequence IPR008271:Serine/threonine-protein kinase, active site IPR011009:Protein kinase-like domain superfamily IPR017441:Protein kinase, ATP binding site IPR021720:Malectin domain IPR032675:Leucine-rich repeat domain superfamily                                         |
|             | TraesCS2A02G418300 | TraesCS2A02G418300.1 | IPR000719:Protein kinase domain IPR008271:Serine/threonine-protein kinase, active site IPR011009:Protein kinase-like domain superfamily IPR017441:Protein kinase, ATP binding site IPR021720:Malectin domain IPR032675:Leucine-rich repeat domain superfamily                                                                                                        |
|             | TraesCS2A02G418400 | TraesCS2A02G418400.1 | IPR000719:Protein kinase domain IPR008271:Serine/threonine-protein kinase, active site IPR011009:Protein kinase-like domain superfamily IPR017441:Protein kinase, ATP binding site IPR021720:Malectin domain IPR032675:Leucine-rich repeat domain superfamily                                                                                                        |
|             | TraesCS2A02G421000 | TraesCS2A02G421000.1 | IPR001611:Leucine-rich repeat IPR002182:NB-ARC IPR027417:P-loop containing nucleoside triphosphate hydrolase IPR032675:Leucine-rich repeat domain superfamily IPR036388:Winged helix-like DNA-binding domain superfamily IPR038005:Virus X resistance protein-like, coiled-coil domain IPR041118:Rx, N-terminal                                                      |
|             | TraesCS2A02G422300 | TraesCS2A02G422300.1 | IPR001128:Cytochrome P450 IPR002401:Cytochrome P450, E-class, group I IPR017972:Cytochrome P450, conserved site IPR036396:Cytochrome P450 superfamily                                                                                                                                                                                                                |
|             | TraesCS2A02G423000 | TraesCS2A02G423000.1 | IPR001810:F-box domain IPR036047:F-box-like domain superfamily                                                                                                                                                                                                                                                                                                       |
|             | TraesCS2A02G423800 | TraesCS2A02G423800.1 | IPR001611:Leucine-rich repeat IPR013210:Leucine-rich repeat-containing N-terminal, plant-type IPR032675:Leucine-rich repeat domain superfamily                                                                                                                                                                                                                       |
| AX.95171319 | TraesCS2A02G555900 | TraesCS2A02G555900.2 | IPR001810:F-box domain IPR006566:FBF domain IPR032675:Leucine-rich repeat domain superfamily IPR036047:F-box-like domain superfamily                                                                                                                                                                                                                                 |
|             | TraesCS2A02G558000 | TraesCS2A02G558000.1 | WAMP-3.1, antimicrobial peptide<br>[Source:UniProtKB/TrEMBL;A cc:H6S4F9] WAMP-3.1, antimicrobial peptide<br>IPR001002:Chitin-binding, type 1 IPR036861:Endochitinase-like superfamily                                                                                                                                                                                |
|             | TraesCS2A02G558500 | TraesCS2A02G558500.1 | IPR000719:Protein kinase domain IPR008271:Serine/threonine-protein kinase, active site IPR011009:Protein kinase-like domain superfamily IPR017441:Protein kinase, ATP binding site                                                                                                                                                                                   |
|             | TraesCS2A02G559000 | TraesCS2A02G559000.1 | IPR000719:Protein kinase domain IPR008271:Serine/threonine-protein kinase, active site IPR011009:Protein kinase-like domain superfamily IPR017441:Protein kinase, ATP binding site IPR000719:Protein kinase domain IPR001245:Serine-threonine/tyrosine-protein kinase, catalytic domain IPR001611:Leucine-rich repeat IPR003591:Leucine-rich repeat, typical subtype |
|             | TraesCS2A02G559400 | TraesCS2A02G559400.1 | IPR008271:Serine/threonine-protein kinase, active site IPR011009:Protein kinase-like domain superfamily IPR013210:Leucine-rich repeat-containing N-terminal, plant-type IPR017441:Protein kinase, ATP binding site IPR032675:Leucine-rich repeat domain superfamily                                                                                                  |
|             | TraesCS2A02G560600 | TraesCS2A02G560600.1 | IPR002182:NB-ARC IPR027417:P-loop containing nucleoside triphosphate hydrolase IPR032675:Leucine-rich repeat domain superfamily IPR041118:Rx, N-terminal                                                                                                                                                                                                             |
|             | TraesCS2A02G560700 | TraesCS2A02G560700.2 | IPR002182:NB-ARC IPR027417:P-loop containing nucleoside triphosphate hydrolase IPR032675:Leucine-rich repeat domain superfamily IPR041118:Rx, N-terminal                                                                                                                                                                                                             |
|             | TraesCS2A02G560700 | TraesCS2A02G560700.1 | IPR002182:NB-ARC IPR027417:P-loop containing nucleoside triphosphate hydrolase IPR032675:Leucine-rich repeat domain superfamily IPR041118:Rx, N-terminal                                                                                                                                                                                                             |
|             | TraesCS2A02G560900 | TraesCS2A02G560900.1 | IPR002182:NB-ARC IPR027417:P-loop containing nucleoside triphosphate hydrolase IPR032675:Leucine-rich repeat domain superfamily IPR041118:Rx, N-terminal                                                                                                                                                                                                             |

|                    |                      |                                                                |                                                                                                                                                                                                                                                                                                                                             |
|--------------------|----------------------|----------------------------------------------------------------|---------------------------------------------------------------------------------------------------------------------------------------------------------------------------------------------------------------------------------------------------------------------------------------------------------------------------------------------|
| 2A                 | TraesCS2A02G561100   | TraesCS2A02G561100.1                                           | IPR002182:NB-ARC IPR027417:P-loop containing nucleoside triphosphate hydrolase                                                                                                                                                                                                                                                              |
|                    | TraesCS2A02G562200   | TraesCS2A02G562200.1                                           | IPR001128:Cytochrome P450 IPR002401:Cytochrome P450, E-class, group I IPR017972:Cytochrome P450, conserved site IPR036396:Cytochrome P450 superfamily                                                                                                                                                                                       |
|                    | TraesCS2A02G562800   | TraesCS2A02G562800.1                                           | IPR000719:Protein kinase domain IPR001245:Serine-threonine/tyrosine-protein kinase, catalytic domain IPR002902:Gnk2-homologous domain IPR008271:Serine/threonine-protein kinase, active site IPR011009:Protein kinase-like domain superfamily IPR038408:Gnk2-homologous domain superfamily                                                  |
|                    | TraesCS2A02G563200   | TraesCS2A02G563200.1                                           | IPR032675:Leucine-rich repeat domain superfamily                                                                                                                                                                                                                                                                                            |
|                    | TraesCS2A02G563200   | TraesCS2A02G563200.2                                           | IPR032675:Leucine-rich repeat domain superfamily                                                                                                                                                                                                                                                                                            |
|                    | TraesCS2A02G563400   | TraesCS2A02G563400.2                                           | IPR000719:Protein kinase domain IPR008271:Serine/threonine-protein kinase, active site IPR011009:Protein kinase-like domain superfamily IPR017441:Protein kinase, ATP binding site IPR021094:NPR1/NIM1-like, C-terminal                                                                                                                     |
|                    | TraesCS2A02G563400   | TraesCS2A02G563400.1                                           | IPR000719:Protein kinase domain IPR008271:Serine/threonine-protein kinase, active site IPR011009:Protein kinase-like domain superfamily IPR017441:Protein kinase, ATP binding site IPR021094:NPR1/NIM1-like, C-terminal                                                                                                                     |
|                    | TraesCS2B02G158700   | TraesCS2B02G158700.1                                           | IPR000719:Protein kinase domain IPR001220:Legume lectin domain IPR008271:Serine/threonine-protein kinase, active site IPR011009:Protein kinase-like domain superfamily IPR013320:Concanavalin A-like lectin/glucanase domain superfamily IPR017441:Protein kinase, ATP binding site                                                         |
|                    | TraesCS2B02G158800   | TraesCS2B02G158800.1                                           | IPR000719:Protein kinase domain IPR001220:Legume lectin domain IPR008271:Serine/threonine-protein kinase, active site IPR011009:Protein kinase-like domain superfamily IPR013320:Concanavalin A-like lectin/glucanase domain superfamily IPR017441:Protein kinase, ATP binding site                                                         |
|                    | TraesCS2B02G163000   | TraesCS2B02G163000.1                                           | IPR000719:Protein kinase domain IPR008271:Serine/threonine-protein kinase, active site IPR011009:Protein kinase-like domain superfamily                                                                                                                                                                                                     |
| TraesCS2B02G163700 | TraesCS2B02G163700.1 | IPR001810:F-box domain IPR036047:F-box-like domain superfamily |                                                                                                                                                                                                                                                                                                                                             |
| A.X.94774467       | TraesCS2B02G220900   | TraesCS2B02G220900.1                                           | IPR000719:Protein kinase domain IPR001220:Legume lectin domain IPR008271:Serine/threonine-protein kinase, active site IPR011009:Protein kinase-like domain superfamily IPR013320:Concanavalin A-like lectin/glucanase domain superfamily IPR017441:Protein kinase, ATP binding site                                                         |
|                    | TraesCS2B02G221100   | TraesCS2B02G221100.1                                           | IPR000719:Protein kinase domain IPR001220:Legume lectin domain IPR008271:Serine/threonine-protein kinase, active site IPR011009:Protein kinase-like domain superfamily IPR013320:Concanavalin A-like lectin/glucanase domain superfamily IPR017441:Protein kinase, ATP binding site                                                         |
|                    | TraesCS2B02G221200   | TraesCS2B02G221200.1                                           | IPR000719:Protein kinase domain IPR001220:Legume lectin domain IPR008271:Serine/threonine-protein kinase, active site IPR011009:Protein kinase-like domain superfamily IPR013320:Concanavalin A-like lectin/glucanase domain superfamily IPR017441:Protein kinase, ATP binding site IPR019825:Legume lectin, beta chain, Mn/Ca-binding site |
| 2B                 | TraesCS2B02G222100   | TraesCS2B02G222100.1                                           | IPR000719:Protein kinase domain IPR011009:Protein kinase-like domain superfamily IPR013210:Leucine-rich repeat-containing N-terminal, plant-type IPR017441:Protein kinase, ATP binding site IPR032675:Leucine-rich repeat domain superfamily                                                                                                |

2B

|             |                    |                      |                                                                                                                                                                                                  |
|-------------|--------------------|----------------------|--------------------------------------------------------------------------------------------------------------------------------------------------------------------------------------------------|
|             | TraesCS2B02G222800 | TraesCS2B02G222800.1 | IPR002182:NB-ARC IPR027417:P-loop containing nucleoside triphosphate hydrolase                                                                                                                   |
|             | TraesCS2B02G222900 | TraesCS2B02G222900.1 | IPR032675:Leucine-rich repeat domain superfamily IPR038005:Virus X resistance protein-like, coiled-coil domain IPR041118:Rx, N-terminal                                                          |
|             | TraesCS2B02G223600 | TraesCS2B02G223600.2 | IPR000719:Protein kinase domain IPR011009:Protein kinase-like domain superfamily                                                                                                                 |
|             | TraesCS2B02G223600 | TraesCS2B02G223600.1 | IPR017441:Protein kinase, ATP binding site                                                                                                                                                       |
|             | TraesCS2B02G225000 | TraesCS2B02G225000.1 | IPR000719:Protein kinase domain IPR008271:Serine/threonine-protein kinase, active site                                                                                                           |
| AX.95165387 | TraesCS2B02G549700 | TraesCS2B02G549700.1 | IPR011009:Protein kinase-like domain superfamily                                                                                                                                                 |
|             | TraesCS2B02G551900 | TraesCS2B02G551900.1 | IPR002182:NB-ARC IPR027417:P-loop containing nucleoside triphosphate hydrolase                                                                                                                   |
|             | TraesCS2B02G552500 | TraesCS2B02G552500.1 | IPR032675:Leucine-rich repeat domain superfamily IPR038005:Virus X resistance protein-like, coiled-coil domain IPR041118:Rx, N-terminal                                                          |
|             | TraesCS2B02G552500 | TraesCS2B02G552500.2 | IPR001128:Cytochrome P450 IPR002401:Cytochrome P450, E-class, group I IPR017972:Cytochrome P450, conserved site IPR036396:Cytochrome P450 superfamily                                            |
|             | TraesCS2B02G552900 | TraesCS2B02G552900.1 | IPR001810:F-box domain IPR036047:F-box-like domain superfamily                                                                                                                                   |
|             | TraesCS2B02G553000 | TraesCS2B02G553000.1 | IPR000719:Protein kinase domain IPR008271:Serine/threonine-protein kinase, active site                                                                                                           |
|             | TraesCS2B02G553200 | TraesCS2B02G553200.1 | IPR011009:Protein kinase-like domain superfamily IPR017441:Protein kinase, ATP binding site                                                                                                      |
|             | TraesCS2B02G554700 | TraesCS2B02G554700.1 | IPR000719:Protein kinase domain IPR008271:Serine/threonine-protein kinase, active site                                                                                                           |
|             | TraesCS2B02G555200 | TraesCS2B02G555200.1 | IPR000719:Protein kinase domain IPR008271:Serine/threonine-protein kinase, active site                                                                                                           |
|             | TraesCS2B02G555200 | TraesCS2B02G555200.2 | IPR011009:Protein kinase-like domain superfamily IPR020635:Tyrosine-protein kinase, catalytic domain                                                                                             |
|             | TraesCS2D02G561100 | TraesCS2D02G561100.1 | IPR001810:F-box domain IPR013187:F-box associated domain, type 3 IPR036047:F-box-like domain superfamily                                                                                         |
| AX.95133018 | TraesCS2D02G561200 | TraesCS2D02G561200.1 | IPR007320:Programmed cell death protein 2, C-terminal                                                                                                                                            |
|             | TraesCS2D02G563800 | TraesCS2D02G563800.1 | IPR013187:F-box associated domain, type 3 IPR017451:F-box associated interaction domain                                                                                                          |
|             | TraesCS2D02G563900 | TraesCS2D02G563900.1 | IPR000719:Protein kinase domain IPR00858:S-locus glycoprotein domain IPR001480:Bulb-type lectin domain IPR003609:PAN/Apple domain IPR008271:Serine/threonine-protein kinase, active site         |
|             |                    |                      | IPR011009:Protein kinase-like domain superfamily IPR017441:Protein kinase, ATP binding site                                                                                                      |
|             |                    |                      | IPR024171:S-receptor-like serine/threonine-protein kinase IPR036426:Bulb-type lectin domain superfamily                                                                                          |
|             |                    |                      | IPR000719:Protein kinase domain IPR011009:Protein kinase-like domain superfamily                                                                                                                 |
|             |                    |                      | IPR017441:Protein kinase, ATP binding site                                                                                                                                                       |
|             |                    |                      | IPR000719:Protein kinase domain IPR001245:Serine-threonine/tyrosine-protein kinase, catalytic domain IPR011009:Protein kinase-like domain superfamily IPR017441:Protein kinase, ATP binding site |
|             |                    |                      | IPR001611:Leucine-rich repeat IPR003591:Leucine-rich repeat, typical subtype IPR013210:Leucine-rich repeat-containing N-terminal, plant-type IPR032675:Leucine-rich repeat domain superfamily    |
|             |                    |                      | IPR000719:Protein kinase domain IPR001245:Serine-threonine/tyrosine-protein kinase, catalytic domain IPR001611:Leucine-rich repeat IPR008271:Serine/threonine-protein kinase, active site        |
|             |                    |                      | IPR011009:Protein kinase-like domain superfamily IPR017441:Protein kinase, ATP binding site                                                                                                      |
|             |                    |                      | IPR025875:Leucine rich repeat 4 IPR032675:Leucine-rich repeat domain superfamily                                                                                                                 |
|             |                    |                      | IPR032675:Leucine-rich repeat domain superfamily                                                                                                                                                 |
|             |                    |                      | IPR001128:Cytochrome P450 IPR002401:Cytochrome P450, E-class, group I IPR017972:Cytochrome P450, conserved site IPR036396:Cytochrome P450 superfamily                                            |



2D

|                    |                      |                                                                                                           |                                                                                                                                                                                                                                                                                                                                                                                                                     |
|--------------------|----------------------|-----------------------------------------------------------------------------------------------------------|---------------------------------------------------------------------------------------------------------------------------------------------------------------------------------------------------------------------------------------------------------------------------------------------------------------------------------------------------------------------------------------------------------------------|
| TraesCS2D02G564300 | TraesCS2D02G564300.1 | Protein kinase domain-containing protein                                                                  | IPR000719:Protein kinase domain IPR008271:Serine/threonine-protein kinase, active site<br>IPR011009:Protein kinase-like domain superfamily IPR017441:Protein kinase, ATP binding site                                                                                                                                                                                                                               |
| TraesCS2D02G566800 | TraesCS2D02G566800.1 | Peroxidase<br>[Source:UniProtKB/TrEMBL;Accession:A0A1D5UJX6] Peroxidase (EC 1.11.1.7)                     | IPR000823:Plant peroxidase IPR002016:Haem peroxidase IPR010255:Haem peroxidase superfamily<br>IPR019793:Peroxidases haem-ligand binding site IPR019794:Peroxidase, active site<br>IPR033905:Secretory peroxidase                                                                                                                                                                                                    |
| TraesCS2D02G566900 | TraesCS2D02G566900.1 | Cytochrome c domain-containing protein                                                                    | IPR002327:Cytochrome c, class IA/ IB IPR009056:Cytochrome c-like domain IPR036909:Cytochrome c-like domain superfamily                                                                                                                                                                                                                                                                                              |
| TraesCS2D02G567200 | TraesCS2D02G567200.1 | NB-ARC domain-containing protein                                                                          | IPR002182:NB-ARC IPR003591:Leucine-rich repeat, typical subtype IPR027417:P-loop containing nucleoside triphosphate hydrolase IPR032675:Leucine-rich repeat domain superfamily                                                                                                                                                                                                                                      |
| TraesCS2D02G567300 | TraesCS2D02G567300.1 |                                                                                                           | IPR032675:Leucine-rich repeat domain superfamily                                                                                                                                                                                                                                                                                                                                                                    |
| TraesCS2D02G567400 | TraesCS2D02G567400.1 | NB-ARC domain-containing protein                                                                          | IPR002182:NB-ARC IPR027417:P-loop containing nucleoside triphosphate hydrolase                                                                                                                                                                                                                                                                                                                                      |
| TraesCS2D02G567500 | TraesCS2D02G567500.1 | Uncharacterized protein                                                                                   | IPR002182:NB-ARC IPR003591:Leucine-rich repeat, typical subtype IPR027417:P-loop containing nucleoside triphosphate hydrolase IPR032675:Leucine-rich repeat domain superfamily<br>IPR038005:Virus X resistance protein-like, coiled-coil domain IPR041118:Rx, N-terminal<br>IPR032675:Leucine-rich repeat domain superfamily IPR038005:Virus X resistance protein-like, coiled-coil domain IPR041118:Rx, N-terminal |
| TraesCS2D02G567800 | TraesCS2D02G567800.1 |                                                                                                           | IPR002182:NB-ARC IPR027417:P-loop containing nucleoside triphosphate hydrolase<br>IPR032675:Leucine-rich repeat domain superfamily                                                                                                                                                                                                                                                                                  |
| TraesCS2D02G568700 | TraesCS2D02G568700.1 |                                                                                                           | IPR032675:Leucine-rich repeat domain superfamily                                                                                                                                                                                                                                                                                                                                                                    |
| TraesCS2D02G568800 | TraesCS2D02G568800.1 |                                                                                                           | IPR032675:Leucine-rich repeat domain superfamily                                                                                                                                                                                                                                                                                                                                                                    |
| TraesCS2D02G568900 | TraesCS2D02G568900.1 |                                                                                                           | IPR032675:Leucine-rich repeat domain superfamily                                                                                                                                                                                                                                                                                                                                                                    |
| TraesCS2D02G569100 | TraesCS2D02G569100.1 |                                                                                                           | IPR001611:Leucine-rich repeat IPR024788:Malectin-like domain IPR032675:Leucine-rich repeat domain superfamily                                                                                                                                                                                                                                                                                                       |
| TraesCS2D02G569400 | TraesCS2D02G569400.1 |                                                                                                           | IPR002182:NB-ARC IPR027417:P-loop containing nucleoside triphosphate hydrolase<br>IPR032675:Leucine-rich repeat domain superfamily IPR041118:Rx, N-terminal                                                                                                                                                                                                                                                         |
| TraesCS2D02G570200 | TraesCS2D02G570200.1 |                                                                                                           | IPR036047:F-box-like domain superfamily<br>IPR000719:Protein kinase domain IPR001245:Serine-threonine/tyrosine-protein kinase, catalytic domain IPR001611:Leucine-rich repeat IPR003591:Leucine-rich repeat, typical subtype                                                                                                                                                                                        |
| TraesCS2D02G571100 | TraesCS2D02G571100.1 |                                                                                                           | IPR008271:Serine/threonine-protein kinase, active site IPR011009:Protein kinase-like domain superfamily IPR013210:Leucine-rich repeat-containing N-terminal, plant-type IPR017441:Protein kinase, ATP binding site IPR032675:Leucine-rich repeat domain superfamily                                                                                                                                                 |
| TraesCS2D02G571600 | TraesCS2D02G571600.1 | WAMP-1, antimicrobial peptide<br>[Source:UniProtKB/TrEMBL;Accession:H6S4F8] WAMP-1, antimicrobial peptide | IPR001002:Chitin-binding, type 1 IPR036861:Endochitinase-like superfamily                                                                                                                                                                                                                                                                                                                                           |
| TraesCS2D02G572000 | TraesCS2D02G572000.2 |                                                                                                           | IPR000719:Protein kinase domain IPR008271:Serine/threonine-protein kinase, active site<br>IPR011009:Protein kinase-like domain superfamily IPR017441:Protein kinase, ATP binding site<br>IPR021094:NPR1/NIM1-like, C-terminal                                                                                                                                                                                       |
| TraesCS2D02G572000 | TraesCS2D02G572000.1 |                                                                                                           | IPR000719:Protein kinase domain IPR008271:Serine/threonine-protein kinase, active site<br>IPR011009:Protein kinase-like domain superfamily IPR017441:Protein kinase, ATP binding site<br>IPR021094:NPR1/NIM1-like, C-terminal                                                                                                                                                                                       |

|              |                    |                      |                                                                                                                                                                                                                                                                                                                                                         |
|--------------|--------------------|----------------------|---------------------------------------------------------------------------------------------------------------------------------------------------------------------------------------------------------------------------------------------------------------------------------------------------------------------------------------------------------|
|              | TraesCS2D02G572600 | TraesCS2D02G572600.1 | IPR000719:Protein kinase domain IPR001245:Serine-threonine/tyrosine-protein kinase, catalytic domain IPR002902:Gnk2-homologous domain IPR008271:Serine/threonine-protein kinase, active site IPR011009:Protein kinase-like domain superfamily IPR038408:Gnk2-homologous domain superfamily                                                              |
| A.X.94429024 | TraesCS3A02G073700 | TraesCS3A02G073700.1 | IPR001611:Leucine-rich repeat IPR002182:NB-ARC IPR027417:P-loop containing nucleoside triphosphate hydrolase IPR032675:Leucine-rich repeat domain superfamily IPR038005:Virus X resistance protein-like, coiled-coil domain IPR041118:Rx, N-terminal                                                                                                    |
|              | TraesCS3A02G073800 | TraesCS3A02G073800.1 | IPR001611:Leucine-rich repeat IPR002182:NB-ARC IPR027417:P-loop containing nucleoside triphosphate hydrolase IPR032675:Leucine-rich repeat domain superfamily IPR038005:Virus X resistance protein-like, coiled-coil domain IPR041118:Rx, N-terminal                                                                                                    |
|              | TraesCS3A02G073900 | TraesCS3A02G073900.1 | IPR000719:Protein kinase domain IPR008271:Serine/threonine-protein kinase, active site IPR011009:Protein kinase-like domain superfamily                                                                                                                                                                                                                 |
| 3A           | TraesCS3A02G074300 | TraesCS3A02G074300.1 | IPR001128:Cytochrome P450 IPR002401:Cytochrome P450, E-class, group I IPR017972:Cytochrome P450, conserved site IPR036396:Cytochrome P450 superfamily                                                                                                                                                                                                   |
|              | TraesCS3A02G074400 | TraesCS3A02G074400.1 | IPR001128:Cytochrome P450 IPR036396:Cytochrome P450 superfamily                                                                                                                                                                                                                                                                                         |
|              | TraesCS3A02G074400 | TraesCS3A02G074400.2 | IPR001128:Cytochrome P450 IPR002401:Cytochrome P450, E-class, group I IPR017972:Cytochrome P450, conserved site IPR036396:Cytochrome P450 superfamily                                                                                                                                                                                                   |
|              | TraesCS3A02G074500 | TraesCS3A02G074500.1 | IPR001128:Cytochrome P450 IPR002401:Cytochrome P450, E-class, group I IPR017972:Cytochrome P450, conserved site IPR036396:Cytochrome P450 superfamily                                                                                                                                                                                                   |
|              | TraesCS3A02G075300 | TraesCS3A02G075300.1 | IPR036047:F-box-like domain superfamily                                                                                                                                                                                                                                                                                                                 |
|              | TraesCS3A02G076000 | TraesCS3A02G076000.1 | IPR002182:NB-ARC IPR027417:P-loop containing nucleoside triphosphate hydrolase IPR038005:Virus X resistance protein-like, coiled-coil domain IPR041118:Rx, N-terminal                                                                                                                                                                                   |
|              | TraesCS3A02G077300 | TraesCS3A02G077300.1 | IPR001128:Cytochrome P450 IPR002401:Cytochrome P450, E-class, group I IPR017972:Cytochrome P450, conserved site IPR036396:Cytochrome P450 superfamily                                                                                                                                                                                                   |
| A.X.94526408 | TraesCS3B02G133000 | TraesCS3B02G133000.1 | IPR001810:F-box domain IPR005174:Domain unknown function DUF295 IPR036047:F-box-like domain superfamily                                                                                                                                                                                                                                                 |
|              | TraesCS3B02G133600 | TraesCS3B02G133600.1 | Uncharacterized protein IPR001128:Cytochrome P450 IPR002401:Cytochrome P450, E-class, group I IPR017972:Cytochrome P450, conserved site IPR036396:Cytochrome P450 superfamily                                                                                                                                                                           |
|              | TraesCS3B02G133700 | TraesCS3B02G133700.1 | Uncharacterized protein IPR001128:Cytochrome P450 IPR002401:Cytochrome P450, E-class, group I IPR017972:Cytochrome P450, conserved site IPR036396:Cytochrome P450 superfamily                                                                                                                                                                           |
|              | TraesCS3B02G134100 | TraesCS3B02G134100.1 | IPR001128:Cytochrome P450 IPR002401:Cytochrome P450, E-class, group I IPR017972:Cytochrome P450, conserved site IPR036396:Cytochrome P450 superfamily                                                                                                                                                                                                   |
| 3B           | TraesCS3B02G135000 | TraesCS3B02G135000.1 | Uncharacterized protein IPR011009:Protein kinase-like domain superfamily                                                                                                                                                                                                                                                                                |
|              | TraesCS3B02G135300 | TraesCS3B02G135300.1 | IPR003657:WRKY domain IPR036576:WRKY domain superfamily                                                                                                                                                                                                                                                                                                 |
|              | TraesCS3B02G136100 | TraesCS3B02G136100.1 | IPR002182:NB-ARC IPR027417:P-loop containing nucleoside triphosphate hydrolase IPR032675:Leucine-rich repeat domain superfamily IPR038005:Virus X resistance protein-like, coiled-coil domain IPR041118:Rx, N-terminal                                                                                                                                  |
|              | TraesCS3B02G136200 | TraesCS3B02G136200.1 | IPR001128:Cytochrome P450 IPR002401:Cytochrome P450, E-class, group I IPR017972:Cytochrome P450, conserved site IPR036396:Cytochrome P450 superfamily                                                                                                                                                                                                   |
|              | TraesCS3B02G136800 | TraesCS3B02G136800.1 | Uncharacterized protein IPR003439:ABC transporter-like IPR003593:AAA+ ATPase domain IPR011527:ABC transporter type 1, transmembrane domain IPR017871:ABC transporter, conserved site IPR027417:P-loop containing nucleoside triphosphate hydrolase IPR036640:ABC transporter type 1, transmembrane domain superfamily IPR039421:Type I protein exporter |

|             |                    |                      |                                                                                                                                                                                                                                                                                                                                                                          |
|-------------|--------------------|----------------------|--------------------------------------------------------------------------------------------------------------------------------------------------------------------------------------------------------------------------------------------------------------------------------------------------------------------------------------------------------------------------|
| AX.94948233 | TraesCS3D02G365400 | TraesCS3D02G365400.1 | IPR001810:F-box domain IPR032675:Leucine-rich repeat domain superfamily IPR036047:F-box-like domain superfamily                                                                                                                                                                                                                                                          |
|             | TraesCS3D02G366300 | TraesCS3D02G366300.1 | IPR001611:Leucine-rich repeat IPR006553:Leucine-rich repeat, cysteine-containing subtype IPR032675:Leucine-rich repeat domain superfamily                                                                                                                                                                                                                                |
|             | TraesCS3D02G366300 | TraesCS3D02G366300.2 | IPR001611:Leucine-rich repeat IPR006553:Leucine-rich repeat, cysteine-containing subtype IPR032675:Leucine-rich repeat domain superfamily                                                                                                                                                                                                                                |
| 3D          | TraesCS3D02G366300 | TraesCS3D02G366300.3 | IPR001611:Leucine-rich repeat IPR006553:Leucine-rich repeat, cysteine-containing subtype IPR032675:Leucine-rich repeat domain superfamily                                                                                                                                                                                                                                |
|             | TraesCS3D02G367500 | TraesCS3D02G367500.1 | IPR001128:Cytochrome P450 IPR002397:Cytochrome P450, B-class IPR017972:Cytochrome P450, conserved site IPR036396:Cytochrome P450 superfamily                                                                                                                                                                                                                             |
|             | TraesCS3D02G368300 | TraesCS3D02G368300.1 | IPR001810:F-box domain IPR036047:F-box-like domain superfamily                                                                                                                                                                                                                                                                                                           |
|             | TraesCS3D02G369100 | TraesCS3D02G369100.1 | IPR000719:Protein kinase domain IPR008271:Serine/threonine-protein kinase, active site IPR011009:Protein kinase-like domain superfamily IPR017441:Protein kinase, ATP binding site                                                                                                                                                                                       |
|             | TraesCS3D02G369100 | TraesCS3D02G369100.2 | IPR011009:Protein kinase-like domain superfamily IPR000719:Protein kinase domain IPR008271:Serine/threonine-protein kinase, active site                                                                                                                                                                                                                                  |
|             | TraesCS4A02G361100 | TraesCS4A02G361100.1 | IPR011009:Protein kinase-like domain superfamily IPR017441:Protein kinase, ATP binding site IPR039192:Glycogen synthase kinase 3, catalytic domain                                                                                                                                                                                                                       |
| AX.94428968 | TraesCS4A02G366300 | TraesCS4A02G366300.1 | IPR001810:F-box domain IPR036047:F-box-like domain superfamily                                                                                                                                                                                                                                                                                                           |
|             | TraesCS4A02G473900 | TraesCS4A02G473900.1 | IPR001810:F-box domain IPR036047:F-box-like domain superfamily                                                                                                                                                                                                                                                                                                           |
|             | TraesCS4A02G474400 | TraesCS4A02G474400.1 | IPR001810:F-box domain IPR036047:F-box-like domain superfamily                                                                                                                                                                                                                                                                                                           |
|             | TraesCS4A02G474600 | TraesCS4A02G474600.1 | IPR001810:F-box domain IPR036047:F-box-like domain superfamily                                                                                                                                                                                                                                                                                                           |
|             | TraesCS4A02G474700 | TraesCS4A02G474700.1 | IPR032675:Leucine-rich repeat domain superfamily                                                                                                                                                                                                                                                                                                                         |
|             | TraesCS4A02G474800 | TraesCS4A02G474800.1 | IPR000719:Protein kinase domain IPR001611:Leucine-rich repeat IPR003591:Leucine-rich repeat, typical subtype IPR008266:Tyrosine-protein kinase, active site IPR011009:Protein kinase-like domain superfamily IPR013210:Leucine-rich repeat-containing N-terminal, plant-type IPR017441:Protein kinase, ATP binding site IPR032675:Leucine-rich repeat domain superfamily |
|             | TraesCS4A02G474800 | TraesCS4A02G474800.2 | IPR000719:Protein kinase domain IPR001611:Leucine-rich repeat IPR003591:Leucine-rich repeat, typical subtype IPR008266:Tyrosine-protein kinase, active site IPR011009:Protein kinase-like domain superfamily IPR013210:Leucine-rich repeat-containing N-terminal, plant-type IPR017441:Protein kinase, ATP binding site IPR032675:Leucine-rich repeat domain superfamily |
|             | TraesCS4A02G474900 | TraesCS4A02G474900.1 | IPR002182:NB-ARC IPR027417:P-loop containing nucleoside triphosphate hydrolase IPR032675:Leucine-rich repeat domain superfamily IPR038005:Virus X resistance protein-like, coiled-coil domain IPR041118:Rx, N-terminal                                                                                                                                                   |
|             | TraesCS4A02G474900 | TraesCS4A02G474900.2 | IPR002182:NB-ARC IPR027417:P-loop containing nucleoside triphosphate hydrolase IPR032675:Leucine-rich repeat domain superfamily IPR038005:Virus X resistance protein-like, coiled-coil domain IPR041118:Rx, N-terminal                                                                                                                                                   |
|             | TraesCS4A02G475400 | TraesCS4A02G475400.1 | IPR002182:NB-ARC IPR027417:P-loop containing nucleoside triphosphate hydrolase                                                                                                                                                                                                                                                                                           |
|             | TraesCS4A02G475700 | TraesCS4A02G475700.1 | IPR032675:Leucine-rich repeat domain superfamily IPR041118:Rx, N-terminal                                                                                                                                                                                                                                                                                                |
|             | TraesCS4A02G475800 | TraesCS4A02G475800.1 | IPR032675:Leucine-rich repeat domain superfamily IPR000719:Protein kinase domain IPR001611:Leucine-rich repeat IPR008271:Serine/threonine-protein kinase, active site IPR011009:Protein kinase-like domain superfamily IPR017441:Protein kinase, ATP binding site IPR032675:Leucine-rich repeat domain superfamily                                                       |
|             | TraesCS4A02G475900 | TraesCS4A02G475900.1 | IPR002182:NB-ARC IPR027417:P-loop containing nucleoside triphosphate hydrolase IPR032675:Leucine-rich repeat domain superfamily                                                                                                                                                                                                                                          |

|                    |                      |                                                                                                                                                                                                                                                                                                                                                                                                                                                       |
|--------------------|----------------------|-------------------------------------------------------------------------------------------------------------------------------------------------------------------------------------------------------------------------------------------------------------------------------------------------------------------------------------------------------------------------------------------------------------------------------------------------------|
| TraesCS4A02G475900 | TraesCS4A02G475900.3 | IPR027417:P-loop containing nucleoside triphosphate hydrolase IPR032675:Leucine-rich repeat domain superfamily                                                                                                                                                                                                                                                                                                                                        |
| TraesCS4A02G475900 | TraesCS4A02G475900.2 | IPR002182:NB-ARC IPR027417:P-loop containing nucleoside triphosphate hydrolase IPR032675:Leucine-rich repeat domain superfamily                                                                                                                                                                                                                                                                                                                       |
| TraesCS4A02G476100 | TraesCS4A02G476100.1 | IPR002182:NB-ARC IPR027417:P-loop containing nucleoside triphosphate hydrolase IPR032675:Leucine-rich repeat domain superfamily                                                                                                                                                                                                                                                                                                                       |
| TraesCS4A02G476300 | TraesCS4A02G476300.1 | IPR032675:Leucine-rich repeat domain superfamily                                                                                                                                                                                                                                                                                                                                                                                                      |
| TraesCS4A02G476200 | TraesCS4A02G476200.1 | IPR002182:NB-ARC IPR027417:P-loop containing nucleoside triphosphate hydrolase IPR032675:Leucine-rich repeat domain superfamily IPR041118:Rx, N-terminal                                                                                                                                                                                                                                                                                              |
| TraesCS4A02G476400 | TraesCS4A02G476400.1 | IPR002182:NB-ARC IPR027417:P-loop containing nucleoside triphosphate hydrolase IPR032675:Leucine-rich repeat domain superfamily                                                                                                                                                                                                                                                                                                                       |
| TraesCS4A02G476600 | TraesCS4A02G476600.2 | IPR002182:NB-ARC IPR027417:P-loop containing nucleoside triphosphate hydrolase IPR032675:Leucine-rich repeat domain superfamily                                                                                                                                                                                                                                                                                                                       |
| TraesCS4A02G476600 | TraesCS4A02G476600.1 | IPR002182:NB-ARC IPR027417:P-loop containing nucleoside triphosphate hydrolase IPR032675:Leucine-rich repeat domain superfamily                                                                                                                                                                                                                                                                                                                       |
| TraesCS4A02G476700 | TraesCS4A02G476700.1 | IPR002182:NB-ARC IPR027417:P-loop containing nucleoside triphosphate hydrolase IPR032675:Leucine-rich repeat domain superfamily                                                                                                                                                                                                                                                                                                                       |
| TraesCS4A02G476800 | TraesCS4A02G476800.1 | IPR001128:Cytochrome P450 IPR002401:Cytochrome P450, E-class, group I IPR017972:Cytochrome P450, conserved site IPR036396:Cytochrome P450 superfamily                                                                                                                                                                                                                                                                                                 |
| TraesCS4A02G476900 | TraesCS4A02G476900.1 | IPR001128:Cytochrome P450 IPR002401:Cytochrome P450, E-class, group I IPR017972:Cytochrome P450, conserved site IPR036396:Cytochrome P450 superfamily                                                                                                                                                                                                                                                                                                 |
| TraesCS4A02G477300 | TraesCS4A02G477300.1 | IPR002182:NB-ARC IPR027417:P-loop containing nucleoside triphosphate hydrolase IPR041118:Rx, N-terminal                                                                                                                                                                                                                                                                                                                                               |
| TraesCS4A02G477400 | TraesCS4A02G477400.1 | IPR032675:Leucine-rich repeat domain superfamily                                                                                                                                                                                                                                                                                                                                                                                                      |
| TraesCS4A02G477600 | TraesCS4A02G477600.1 | IPR032675:Leucine-rich repeat domain superfamily                                                                                                                                                                                                                                                                                                                                                                                                      |
| TraesCS4A02G477700 | TraesCS4A02G477700.1 | IPR002182:NB-ARC IPR027417:P-loop containing nucleoside triphosphate hydrolase IPR041118:Rx, N-terminal                                                                                                                                                                                                                                                                                                                                               |
| TraesCS4A02G477800 | TraesCS4A02G477800.1 | IPR002182:NB-ARC IPR027417:P-loop containing nucleoside triphosphate hydrolase IPR032675:Leucine-rich repeat domain superfamily                                                                                                                                                                                                                                                                                                                       |
| TraesCS4A02G478000 | TraesCS4A02G478000.1 | IPR032675:Leucine-rich repeat domain superfamily                                                                                                                                                                                                                                                                                                                                                                                                      |
| TraesCS4A02G478100 | TraesCS4A02G478100.1 | IPR002182:NB-ARC IPR027417:P-loop containing nucleoside triphosphate hydrolase IPR041118:Rx, N-terminal                                                                                                                                                                                                                                                                                                                                               |
| TraesCS4A02G478200 | TraesCS4A02G478200.1 | IPR002182:NB-ARC IPR027417:P-loop containing nucleoside triphosphate hydrolase IPR032675:Leucine-rich repeat domain superfamily                                                                                                                                                                                                                                                                                                                       |
| TraesCS4A02G478400 | TraesCS4A02G478400.1 | IPR002182:NB-ARC IPR027417:P-loop containing nucleoside triphosphate hydrolase IPR032675:Leucine-rich repeat domain superfamily                                                                                                                                                                                                                                                                                                                       |
| TraesCS4A02G478600 | TraesCS4A02G478600.1 | IPR002182:NB-ARC IPR027417:P-loop containing nucleoside triphosphate hydrolase IPR032675:Leucine-rich repeat domain superfamily IPR041118:Rx, N-terminal                                                                                                                                                                                                                                                                                              |
| TraesCS4A02G478700 | TraesCS4A02G478700.1 | IPR000719:Protein kinase domain IPR001245:Serine-threonine/tyrosine-protein kinase, catalytic domain IPR001611:Leucine-rich repeat IPR003591:Leucine-rich repeat, typical subtype IPR008271:Serine/threonine-protein kinase, active site IPR011009:Protein kinase-like domain superfamily IPR013210:Leucine-rich repeat-containing N-terminal, plant-type IPR017441:Protein kinase, ATP binding site IPR032675:Leucine-rich repeat domain superfamily |

|                    |                      |                                                                                                                                                                                                                                                         |
|--------------------|----------------------|---------------------------------------------------------------------------------------------------------------------------------------------------------------------------------------------------------------------------------------------------------|
| TraesCS4A02G478800 | TraesCS4A02G478800.1 | IPR002182:NB-ARC IPR027417:P-loop containing nucleoside triphosphate hydrolase<br>IPR032675:Leucine-rich repeat domain superfamily                                                                                                                      |
| TraesCS4A02G478900 | TraesCS4A02G478900.1 | IPR002182:NB-ARC IPR027417:P-loop containing nucleoside triphosphate hydrolase<br>IPR032675:Leucine-rich repeat domain superfamily                                                                                                                      |
| TraesCS4A02G479100 | TraesCS4A02G479100.1 | IPR002182:NB-ARC IPR027417:P-loop containing nucleoside triphosphate hydrolase IPR041118:Rx, N-terminal                                                                                                                                                 |
| TraesCS4A02G479200 | TraesCS4A02G479200.1 | IPR001611:Leucine-rich repeat IPR013210:Leucine-rich repeat-containing N-terminal, plant-type<br>IPR032675:Leucine-rich repeat domain superfamily                                                                                                       |
| TraesCS4A02G479300 | TraesCS4A02G479300.1 | IPR000719:Protein kinase domain IPR001245:Serine-threonine/tyrosine-protein kinase, catalytic domain IPR008271:Serine/threonine-protein kinase, active site IPR011009:Protein kinase-like domain superfamily IPR017441:Protein kinase, ATP binding site |
| TraesCS4A02G479400 | TraesCS4A02G479400.1 | IPR002182:NB-ARC IPR027417:P-loop containing nucleoside triphosphate hydrolase<br>IPR032675:Leucine-rich repeat domain superfamily IPR041118:Rx, N-terminal                                                                                             |
| TraesCS4A02G479700 | TraesCS4A02G479700.1 | IPR002182:NB-ARC IPR027417:P-loop containing nucleoside triphosphate hydrolase<br>IPR032675:Leucine-rich repeat domain superfamily IPR041118:Rx, N-terminal                                                                                             |
| TraesCS4A02G479900 | TraesCS4A02G479900.1 | IPR002182:NB-ARC IPR027417:P-loop containing nucleoside triphosphate hydrolase                                                                                                                                                                          |
| TraesCS4A02G480000 | TraesCS4A02G480000.1 | IPR032675:Leucine-rich repeat domain superfamily                                                                                                                                                                                                        |
| TraesCS4A02G480100 | TraesCS4A02G480100.1 | IPR002182:NB-ARC IPR027417:P-loop containing nucleoside triphosphate hydrolase<br>IPR032675:Leucine-rich repeat domain superfamily IPR041118:Rx, N-terminal                                                                                             |
| TraesCS4A02G480200 | TraesCS4A02G480200.1 | IPR002182:NB-ARC IPR027417:P-loop containing nucleoside triphosphate hydrolase<br>IPR032675:Leucine-rich repeat domain superfamily                                                                                                                      |
| TraesCS4A02G480300 | TraesCS4A02G480300.1 | IPR032675:Leucine-rich repeat domain superfamily                                                                                                                                                                                                        |
| TraesCS4A02G480400 | TraesCS4A02G480400.1 | IPR001128:Cytochrome P450 IPR002401:Cytochrome P450, E-class, group I IPR017972:Cytochrome P450, conserved site IPR036396:Cytochrome P450 superfamily                                                                                                   |
| TraesCS4A02G481200 | TraesCS4A02G481200.1 | IPR000719:Protein kinase domain IPR011009:Protein kinase-like domain superfamily<br>IPR017441:Protein kinase, ATP binding site                                                                                                                          |
| TraesCS4A02G481300 | TraesCS4A02G481300.4 | IPR000719:Protein kinase domain IPR008271:Serine/threonine-protein kinase, active site<br>IPR011009:Protein kinase-like domain superfamily IPR017441:Protein kinase, ATP binding site<br>IPR024171:S-receptor-like serine/threonine-protein kinase      |
| TraesCS4A02G481300 | TraesCS4A02G481300.1 | IPR000719:Protein kinase domain IPR008271:Serine/threonine-protein kinase, active site<br>IPR011009:Protein kinase-like domain superfamily IPR017441:Protein kinase, ATP binding site<br>IPR024171:S-receptor-like serine/threonine-protein kinase      |
| TraesCS4A02G481300 | TraesCS4A02G481300.5 | IPR000719:Protein kinase domain IPR011009:Protein kinase-like domain superfamily<br>IPR017441:Protein kinase, ATP binding site                                                                                                                          |
| TraesCS4A02G481300 | TraesCS4A02G481300.2 | IPR000719:Protein kinase domain IPR008271:Serine/threonine-protein kinase, active site<br>IPR011009:Protein kinase-like domain superfamily IPR017441:Protein kinase, ATP binding site<br>IPR024171:S-receptor-like serine/threonine-protein kinase      |
| TraesCS4A02G481300 | TraesCS4A02G481300.3 | IPR000719:Protein kinase domain IPR008271:Serine/threonine-protein kinase, active site<br>IPR011009:Protein kinase-like domain superfamily IPR017441:Protein kinase, ATP binding site<br>IPR024171:S-receptor-like serine/threonine-protein kinase      |
| TraesCS4A02G481600 | TraesCS4A02G481600.1 | IPR000719:Protein kinase domain IPR008271:Serine/threonine-protein kinase, active site<br>IPR011009:Protein kinase-like domain superfamily IPR017441:Protein kinase, ATP binding site                                                                   |
| TraesCS4A02G482500 | TraesCS4A02G482500.1 | IPR000719:Protein kinase domain IPR011009:Protein kinase-like domain superfamily                                                                                                                                                                        |
| TraesCS4A02G482600 | TraesCS4A02G482600.1 | IPR000719:Protein kinase domain IPR011009:Protein kinase-like domain superfamily                                                                                                                                                                        |

|                    |                      |                                            |                                                                                                                                                                                                     |
|--------------------|----------------------|--------------------------------------------|-----------------------------------------------------------------------------------------------------------------------------------------------------------------------------------------------------|
| TraesCS4A02G482700 | TraesCS4A02G482700.1 |                                            | IPR000719:Protein kinase domain IPR011009:Protein kinase-like domain superfamily                                                                                                                    |
| TraesCS4A02G482800 | TraesCS4A02G482800.1 |                                            | IPR001611:Leucine-rich repeat IPR013210:Leucine-rich repeat-containing N-terminal, plant-type IPR032675:Leucine-rich repeat domain superfamily                                                      |
| TraesCS4A02G482900 | TraesCS4A02G482900.1 |                                            | IPR000719:Protein kinase domain IPR011009:Protein kinase-like domain superfamily                                                                                                                    |
| TraesCS4A02G483000 | TraesCS4A02G483000.1 |                                            | IPR000719:Protein kinase domain IPR011009:Protein kinase-like domain superfamily                                                                                                                    |
| TraesCS4A02G483200 | TraesCS4A02G483200.1 |                                            | IPR001611:Leucine-rich repeat IPR003591:Leucine-rich repeat, typical subtype IPR013210:Leucine-rich repeat-containing N-terminal, plant-type IPR032675:Leucine-rich repeat domain superfamily       |
| TraesCS4A02G483300 | TraesCS4A02G483300.1 |                                            | IPR000719:Protein kinase domain IPR011009:Protein kinase-like domain superfamily                                                                                                                    |
| TraesCS4A02G483300 | TraesCS4A02G483300.2 |                                            | IPR000719:Protein kinase domain IPR011009:Protein kinase-like domain superfamily                                                                                                                    |
| TraesCS4A02G483300 | TraesCS4A02G483300.3 |                                            | IPR000719:Protein kinase domain IPR011009:Protein kinase-like domain superfamily                                                                                                                    |
| TraesCS4A02G483400 | TraesCS4A02G483400.1 |                                            | IPR001611:Leucine-rich repeat                                                                                                                                                                       |
| TraesCS4A02G483500 | TraesCS4A02G483500.1 |                                            | IPR001611:Leucine-rich repeat IPR003591:Leucine-rich repeat, typical subtype IPR032675:Leucine-rich repeat domain superfamily                                                                       |
|                    |                      | Serine/threonine-protein kinase            | IPR000719:Protein kinase domain IPR000858:S-locus glycoprotein domain IPR001480:Bulb-type lectin domain IPR003609:PAN/Apple domain IPR008271:Serine/threonine-protein kinase, active site           |
| TraesCS4A02G483600 | TraesCS4A02G483600.1 | [Source:UniProtKB/TrEMBL;Accession:W5DMF5] | IPR011009:Protein kinase-like domain superfamily IPR017441:Protein kinase, ATP binding site IPR024171:S-receptor-like serine/threonine-protein kinase IPR036426:Bulb-type lectin domain superfamily |
|                    |                      |                                            | IPR001611:Leucine-rich repeat IPR003591:Leucine-rich repeat, typical subtype IPR032675:Leucine-rich repeat domain superfamily                                                                       |
| AX.94828722        | TraesCS4A02G483700   | TraesCS4A02G483700.1                       |                                                                                                                                                                                                     |
|                    | TraesCS4B02G384500   | TraesCS4B02G384500.1                       | IPR036047:F-box-like domain superfamily                                                                                                                                                             |
|                    |                      | Peroxidase                                 | IPR000823:Plant peroxidase IPR002016:Haem peroxidase IPR010255:Haem peroxidase superfamily                                                                                                          |
|                    | TraesCS4B02G385000   | TraesCS4B02G385000.1                       | [Source:UniProtKB/TrEMBL;Accession:A0A1D5XGR8] IPR019793:Peroxidases haem-ligand binding site IPR019794:Peroxidase, active site IPR033905:Secretory peroxidase                                      |
|                    | TraesCS4B02G387600   | TraesCS4B02G387600.1                       | IPR000719:Protein kinase domain IPR008271:Serine/threonine-protein kinase, active site                                                                                                              |
|                    | TraesCS4B02G388000   | TraesCS4B02G388000.1                       | IPR011009:Protein kinase-like domain superfamily IPR017441:Protein kinase, ATP binding site                                                                                                         |
|                    | TraesCS4B02G388500   | TraesCS4B02G388500.1                       | IPR036047:F-box-like domain superfamily                                                                                                                                                             |
|                    | TraesCS4B02G388600   | TraesCS4B02G388600.1                       | IPR001128:Cytochrome P450 IPR002401:Cytochrome P450, E-class, group I IPR017972:Cytochrome P450, conserved site IPR036396:Cytochrome P450 superfamily                                               |
|                    |                      |                                            | IPR001128:Cytochrome P450 IPR002401:Cytochrome P450, E-class, group I IPR017972:Cytochrome P450, conserved site IPR036396:Cytochrome P450 superfamily                                               |
|                    |                      | Protein DETOXIFICATION                     |                                                                                                                                                                                                     |
|                    | TraesCS4B02G388800   | TraesCS4B02G388800.1                       | [Source:UniProtKB/TrEMBL;Accession:A0A1D6DH59] IPR002528:Multi antimicrobial extrusion protein                                                                                                      |
|                    | TraesCS4B02G389200   | TraesCS4B02G389200.1                       | IPR036047:F-box-like domain superfamily                                                                                                                                                             |
|                    | TraesCS4B02G389300   | TraesCS4B02G389300.1                       | IPR001128:Cytochrome P450 IPR002403:Cytochrome P450, E-class, group IV IPR017972:Cytochrome P450, conserved site IPR036396:Cytochrome P450 superfamily                                              |
|                    | TraesCS4B02G389400   | TraesCS4B02G389400.1                       | IPR001128:Cytochrome P450 IPR002401:Cytochrome P450, E-class, group I IPR017972:Cytochrome P450, conserved site IPR036396:Cytochrome P450 superfamily                                               |
|                    | TraesCS4B02G389600   | TraesCS4B02G389600.1                       | IPR036047:F-box-like domain superfamily                                                                                                                                                             |

|             |                    |                      |                                                                                                |                                                                                                                                                                                                                                                                                                                                                                                                       |
|-------------|--------------------|----------------------|------------------------------------------------------------------------------------------------|-------------------------------------------------------------------------------------------------------------------------------------------------------------------------------------------------------------------------------------------------------------------------------------------------------------------------------------------------------------------------------------------------------|
|             |                    |                      |                                                                                                | IPR000719:Protein kinase domain IPR001245:Serine-threonine/tyrosine-protein kinase, catalytic domain IPR001611:Leucine-rich repeat IPR008271:Serine/threonine-protein kinase, active site IPR011009:Protein kinase-like domain superfamily IPR017441:Protein kinase, ATP binding site IPR024788:Malectin-like domain IPR025875:Leucine rich repeat 4 IPR032675:Leucine-rich repeat domain superfamily |
|             | TraesCS4B02G389700 | TraesCS4B02G389700.1 |                                                                                                |                                                                                                                                                                                                                                                                                                                                                                                                       |
|             | TraesCS4B02G391600 | TraesCS4B02G391600.1 |                                                                                                | IPR036047:F-box-like domain superfamily                                                                                                                                                                                                                                                                                                                                                               |
|             | TraesCS4B02G392900 | TraesCS4B02G392900.1 |                                                                                                | IPR001810:F-box domain IPR036047:F-box-like domain superfamily                                                                                                                                                                                                                                                                                                                                        |
| AX.94792356 | TraesCS4D02G074100 | TraesCS4D02G074100.1 |                                                                                                | IPR000719:Protein kinase domain IPR001611:Leucine-rich repeat IPR003591:Leucine-rich repeat, typical subtype IPR011009:Protein kinase-like domain superfamily IPR032675:Leucine-rich repeat domain superfamily                                                                                                                                                                                        |
|             |                    |                      | SNF1-type serine-threonine protein kinase                                                      |                                                                                                                                                                                                                                                                                                                                                                                                       |
| 4D          | TraesCS4D02G078100 | TraesCS4D02G078100.1 | [Source:UniProtKB/TrEMBL;Accession:W5ES46]                                                     | IPR000719:Protein kinase domain IPR008271:Serine/threonine-protein kinase, active site IPR011009:Protein kinase-like domain superfamily IPR017441:Protein kinase, ATP binding site                                                                                                                                                                                                                    |
|             |                    |                      | SNF1-type serine-threonine protein kinase                                                      |                                                                                                                                                                                                                                                                                                                                                                                                       |
|             | TraesCS4D02G078100 | TraesCS4D02G078100.1 | [Source:UniProtKB/TrEMBL;Accession:W5ES46]                                                     | IPR000719:Protein kinase domain IPR008271:Serine/threonine-protein kinase, active site IPR011009:Protein kinase-like domain superfamily                                                                                                                                                                                                                                                               |
|             | TraesCS4D02G079000 | TraesCS4D02G079000.1 |                                                                                                | IPR001810:F-box domain IPR036047:F-box-like domain superfamily                                                                                                                                                                                                                                                                                                                                        |
| AX.94699167 | TraesCS5A02G387000 | TraesCS5A02G387000.1 |                                                                                                | IPR000719:Protein kinase domain IPR008271:Serine/threonine-protein kinase, active site IPR011009:Protein kinase-like domain superfamily IPR017441:Protein kinase, ATP binding site                                                                                                                                                                                                                    |
|             | TraesCS5A02G387100 | TraesCS5A02G387100.1 |                                                                                                | IPR000719:Protein kinase domain IPR008271:Serine/threonine-protein kinase, active site IPR011009:Protein kinase-like domain superfamily IPR017441:Protein kinase, ATP binding site                                                                                                                                                                                                                    |
|             | TraesCS5A02G388600 | TraesCS5A02G388600.1 |                                                                                                | IPR001810:F-box domain IPR036047:F-box-like domain superfamily                                                                                                                                                                                                                                                                                                                                        |
|             |                    |                      |                                                                                                | IPR000719:Protein kinase domain IPR001611:Leucine-rich repeat IPR003591:Leucine-rich repeat, typical subtype IPR008271:Serine/threonine-protein kinase, active site IPR011009:Protein kinase-like domain superfamily IPR013210:Leucine-rich repeat-containing N-terminal, plant-type                                                                                                                  |
|             | TraesCS5A02G388800 | TraesCS5A02G388800.1 |                                                                                                | IPR017441:Protein kinase, ATP binding site IPR032675:Leucine-rich repeat domain superfamily                                                                                                                                                                                                                                                                                                           |
|             |                    |                      | Tousled-like protein kinase                                                                    |                                                                                                                                                                                                                                                                                                                                                                                                       |
|             | TraesCS5A02G389200 | TraesCS5A02G389200.1 | [Source:UniProtKB/TrEMBL;Accession:Q516Y0]                                                     | IPR000719:Protein kinase domain IPR008271:Serine/threonine-protein kinase, active site IPR011009:Protein kinase-like domain superfamily IPR017441:Protein kinase, ATP binding site                                                                                                                                                                                                                    |
|             |                    |                      | Tousled-like protein kinase                                                                    |                                                                                                                                                                                                                                                                                                                                                                                                       |
|             | TraesCS5A02G389200 | TraesCS5A02G389200.1 | [Source:UniProtKB/TrEMBL;Accession:Q516Y0]                                                     | IPR000719:Protein kinase domain IPR008271:Serine/threonine-protein kinase, active site IPR011009:Protein kinase-like domain superfamily IPR017441:Protein kinase, ATP binding site                                                                                                                                                                                                                    |
| 5A          |                    |                      | Protein TORNADO 1                                                                              |                                                                                                                                                                                                                                                                                                                                                                                                       |
|             | TraesCS5A02G390900 | TraesCS5A02G390900.1 | [Source:Projected from Arabidopsis thaliana (AT5G55540) UniProtKB/Swiss-Prot;Accession:Q9FJ57] | IPR001611:Leucine-rich repeat IPR032675:Leucine-rich repeat domain superfamily                                                                                                                                                                                                                                                                                                                        |

|              |                    |                      |                                                                                                                   |                                                                                                                                                                                                                                                                                                                                                                                  |
|--------------|--------------------|----------------------|-------------------------------------------------------------------------------------------------------------------|----------------------------------------------------------------------------------------------------------------------------------------------------------------------------------------------------------------------------------------------------------------------------------------------------------------------------------------------------------------------------------|
|              | TraesCS5A02G391900 | TraesCS5A02G391900.1 | CYB5<br>[Source:UniProtKB/TrEMBL;Acc:M9PJX7] CYB5<br>Protein kinase superfamily<br>protein [Source:Projected from | IPR001199:Cytochrome b5-like heme/steroid binding domain IPR018506:Cytochrome b5, heme-binding site IPR036400:Cytochrome b5-like heme/steroid binding domain superfamily                                                                                                                                                                                                         |
|              | TraesCS5A02G392500 | TraesCS5A02G392500.1 | Arabidopsis thaliana<br>(AT1G69220)<br>UniProtKB/TrEMBL;Acc:O245<br>27]                                           | IPR000719:Protein kinase domain IPR011009:Protein kinase-like domain superfamily<br>IPR017441:Protein kinase, ATP binding site                                                                                                                                                                                                                                                   |
|              | TraesCS5A02G393000 | TraesCS5A02G393000.1 |                                                                                                                   | IPR000719:Protein kinase domain IPR001611:Leucine-rich repeat IPR003591:Leucine-rich repeat, typical subtype IPR008271:Serine/threonine-protein kinase, active site IPR011009:Protein kinase-like domain superfamily IPR013210:Leucine-rich repeat-containing N-terminal, plant-type IPR017441:Protein kinase, ATP binding site IPR032675:Leucine-rich repeat domain superfamily |
| A.X.94406039 | TraesCS5B02G003200 | TraesCS5B02G003200.1 |                                                                                                                   | IPR001611:Leucine-rich repeat IPR032675:Leucine-rich repeat domain superfamily                                                                                                                                                                                                                                                                                                   |
|              | TraesCS5B02G003200 | TraesCS5B02G003200.2 |                                                                                                                   | IPR001611:Leucine-rich repeat IPR032675:Leucine-rich repeat domain superfamily<br>IPR000719:Protein kinase domain IPR008271:Serine/threonine-protein kinase, active site                                                                                                                                                                                                         |
|              | TraesCS5B02G004300 | TraesCS5B02G004300.1 |                                                                                                                   | IPR011009:Protein kinase-like domain superfamily IPR013210:Leucine-rich repeat-containing N-terminal, plant-type IPR017441:Protein kinase, ATP binding site IPR031071:LRR receptor-like serine/threonine-protein kinase FEI1/2 IPR032675:Leucine-rich repeat domain superfamily                                                                                                  |
|              | TraesCS5B02G004500 | TraesCS5B02G004500.1 |                                                                                                                   | IPR001128:Cytochrome P450 IPR002403:Cytochrome P450, E-class, group IV IPR017972:Cytochrome P450, conserved site IPR036396:Cytochrome P450 superfamily                                                                                                                                                                                                                           |
|              | TraesCS5B02G004600 | TraesCS5B02G004600.1 |                                                                                                                   | IPR001128:Cytochrome P450 IPR002403:Cytochrome P450, E-class, group IV IPR017972:Cytochrome P450, conserved site IPR036396:Cytochrome P450 superfamily                                                                                                                                                                                                                           |
|              | TraesCS5B02G004900 | TraesCS5B02G004900.1 |                                                                                                                   | IPR001128:Cytochrome P450 IPR002403:Cytochrome P450, E-class, group IV IPR017972:Cytochrome P450, conserved site IPR036396:Cytochrome P450 superfamily                                                                                                                                                                                                                           |
|              | TraesCS5B02G005400 | TraesCS5B02G005400.2 |                                                                                                                   | IPR000719:Protein kinase domain IPR001245:Serine-threonine/tyrosine-protein kinase, catalytic domain IPR008271:Serine/threonine-protein kinase, active site IPR011009:Protein kinase-like domain superfamily IPR017441:Protein kinase, ATP binding site                                                                                                                          |
| 5B           | TraesCS5B02G005400 | TraesCS5B02G005400.1 |                                                                                                                   | IPR000719:Protein kinase domain IPR001245:Serine-threonine/tyrosine-protein kinase, catalytic domain IPR008271:Serine/threonine-protein kinase, active site IPR011009:Protein kinase-like domain superfamily IPR017441:Protein kinase, ATP binding site                                                                                                                          |
|              | TraesCS5B02G005400 | TraesCS5B02G005400.3 |                                                                                                                   | IPR000719:Protein kinase domain IPR001245:Serine-threonine/tyrosine-protein kinase, catalytic domain IPR008271:Serine/threonine-protein kinase, active site IPR011009:Protein kinase-like domain superfamily IPR017441:Protein kinase, ATP binding site                                                                                                                          |
|              | TraesCS5B02G005700 | TraesCS5B02G005700.1 |                                                                                                                   | IPR000719:Protein kinase domain IPR002182:NB-ARC IPR008271:Serine/threonine-protein kinase, active site IPR011009:Protein kinase-like domain superfamily IPR017441:Protein kinase, ATP binding site IPR027417:P-loop containing nucleoside triphosphate hydrolase                                                                                                                |
|              | TraesCS5B02G007000 | TraesCS5B02G007000.2 |                                                                                                                   | IPR001128:Cytochrome P450 IPR002401:Cytochrome P450, E-class, group I IPR017972:Cytochrome P450, conserved site IPR036396:Cytochrome P450 superfamily                                                                                                                                                                                                                            |
|              | TraesCS5B02G007000 | TraesCS5B02G007000.1 |                                                                                                                   | IPR001128:Cytochrome P450 IPR002401:Cytochrome P450, E-class, group I IPR017972:Cytochrome P450, conserved site IPR036396:Cytochrome P450 superfamily                                                                                                                                                                                                                            |



|             |                    |                      |                                                 |                                                                                                                                                                                                                                                                                                                                                                                                 |
|-------------|--------------------|----------------------|-------------------------------------------------|-------------------------------------------------------------------------------------------------------------------------------------------------------------------------------------------------------------------------------------------------------------------------------------------------------------------------------------------------------------------------------------------------|
|             |                    |                      | p450                                            | IPR001128:Cytochrome P450 IPR002401:Cytochrome P450, E-class, group I IPR017972:Cytochrome P450, conserved site IPR036396:Cytochrome P450 superfamily                                                                                                                                                                                                                                           |
|             | TraesCS5B02G007100 | TraesCS5B02G007100.1 | [Source:UniProtKB/TrEMBL;Accession:Q58A30] P450 |                                                                                                                                                                                                                                                                                                                                                                                                 |
|             |                    |                      | p450                                            | IPR001128:Cytochrome P450 IPR002401:Cytochrome P450, E-class, group I IPR017972:Cytochrome P450, conserved site IPR036396:Cytochrome P450 superfamily                                                                                                                                                                                                                                           |
|             | TraesCS5B02G007200 | TraesCS5B02G007200.1 | [Source:UniProtKB/TrEMBL;Accession:Q58A32] P450 |                                                                                                                                                                                                                                                                                                                                                                                                 |
| AX.95010548 | TraesCS5B02G056700 | TraesCS5B02G056700.1 |                                                 | IPR000719:Protein kinase domain IPR002902:Gnk2-homologous domain IPR008271:Serine/threonine-protein kinase, active site IPR011009:Protein kinase-like domain superfamily IPR017441:Protein kinase, ATP binding site IPR038408:Gnk2-homologous domain superfamily                                                                                                                                |
|             | TraesCS5B02G056800 | TraesCS5B02G056800.1 |                                                 | IPR000719:Protein kinase domain IPR002902:Gnk2-homologous domain IPR008271:Serine/threonine-protein kinase, active site IPR011009:Protein kinase-like domain superfamily IPR017441:Protein kinase, ATP binding site IPR038408:Gnk2-homologous domain superfamily                                                                                                                                |
|             | TraesCS5B02G056900 | TraesCS5B02G056900.1 |                                                 | IPR000719:Protein kinase domain IPR002902:Gnk2-homologous domain IPR008271:Serine/threonine-protein kinase, active site IPR011009:Protein kinase-like domain superfamily IPR017441:Protein kinase, ATP binding site IPR038408:Gnk2-homologous domain superfamily                                                                                                                                |
|             | TraesCS5B02G057205 | TraesCS5B02G057205.1 |                                                 | IPR000719:Protein kinase domain IPR008271:Serine/threonine-protein kinase, active site IPR011009:Protein kinase-like domain superfamily IPR017441:Protein kinase, ATP binding site IPR025287:Wall-associated receptor kinase, galacturonan-binding domain                                                                                                                                       |
|             | TraesCS5B02G057500 | TraesCS5B02G057500.1 |                                                 | IPR000719:Protein kinase domain IPR008271:Serine/threonine-protein kinase, active site IPR011009:Protein kinase-like domain superfamily IPR017441:Protein kinase, ATP binding site                                                                                                                                                                                                              |
|             | TraesCS5B02G057700 | TraesCS5B02G057700.1 |                                                 | IPR000719:Protein kinase domain IPR002902:Gnk2-homologous domain IPR008271:Serine/threonine-protein kinase, active site IPR011009:Protein kinase-like domain superfamily IPR017441:Protein kinase, ATP binding site IPR038408:Gnk2-homologous domain superfamily                                                                                                                                |
|             | TraesCS5B02G057900 | TraesCS5B02G057900.1 |                                                 | IPR006566:FBD domain IPR032675:Leucine-rich repeat domain superfamily IPR036047:F-box-like domain superfamily                                                                                                                                                                                                                                                                                   |
|             | TraesCS5B02G058100 | TraesCS5B02G058100.1 |                                                 | IPR006566:FBD domain IPR032675:Leucine-rich repeat domain superfamily IPR036047:F-box-like domain superfamily                                                                                                                                                                                                                                                                                   |
| 5B          | TraesCS5B02G058300 | TraesCS5B02G058300.1 |                                                 | IPR001810:F-box domain IPR032675:Leucine-rich repeat domain superfamily IPR036047:F-box-like domain superfamily                                                                                                                                                                                                                                                                                 |
|             | TraesCS5B02G058900 | TraesCS5B02G058900.1 |                                                 | IPR032675:Leucine-rich repeat domain superfamily                                                                                                                                                                                                                                                                                                                                                |
|             | TraesCS5B02G059000 | TraesCS5B02G059000.2 |                                                 | IPR000719:Protein kinase domain IPR001611:Leucine-rich repeat IPR002182:NB-ARC IPR003591:Leucine-rich repeat, typical subtype IPR008271:Serine/threonine-protein kinase, active site IPR011009:Protein kinase-like domain superfamily IPR017441:Protein kinase, ATP binding site IPR027417:P-loop containing nucleoside triphosphate hydrolase IPR032675:Leucine-rich repeat domain superfamily |
|             | TraesCS5B02G059000 | TraesCS5B02G059000.1 |                                                 | IPR000719:Protein kinase domain IPR001611:Leucine-rich repeat IPR002182:NB-ARC IPR003591:Leucine-rich repeat, typical subtype IPR008271:Serine/threonine-protein kinase, active site IPR011009:Protein kinase-like domain superfamily IPR017441:Protein kinase, ATP binding site IPR027417:P-loop containing nucleoside triphosphate hydrolase IPR032675:Leucine-rich repeat domain superfamily |

|              |      |  |                                                                                                                              |                                                                                                                                                                                                                                                                  |
|--------------|------|--|------------------------------------------------------------------------------------------------------------------------------|------------------------------------------------------------------------------------------------------------------------------------------------------------------------------------------------------------------------------------------------------------------|
|              |      |  | Non-specific serine/threonine protein kinase<br>[Source:UniProtKB/TrEMBL;Acc:A0A341VB71]                                     | IPR000719:Protein kinase domain IPR004041:NAF domain IPR008271:Serine/threonine-protein kinase, active site IPR011009:Protein kinase-like domain superfamily IPR017441:Protein kinase, ATP binding site IPR018451:NAF/FISL domain                                |
|              |      |  |                                                                                                                              | IPR001810:F-box domain IPR032675:Leucine-rich repeat domain superfamily IPR036047:F-box-like domain superfamily                                                                                                                                                  |
|              | #N/A |  |                                                                                                                              | IPR032675:Leucine-rich repeat domain superfamily                                                                                                                                                                                                                 |
|              |      |  |                                                                                                                              | IPR025287:Wall-associated receptor kinase, galacturonan-binding domain                                                                                                                                                                                           |
|              |      |  |                                                                                                                              | IPR000719:Protein kinase domain IPR000858:S-locus glycoprotein domain IPR001480:Bulb-type lectin domain IPR011009:Protein kinase-like domain superfamily IPR024171:S-receptor-like serine/threonine-protein kinase IPR036426:Bulb-type lectin domain superfamily |
|              |      |  |                                                                                                                              | IPR013989:Development/cell death domain                                                                                                                                                                                                                          |
|              |      |  |                                                                                                                              | IPR000719:Protein kinase domain IPR000858:S-locus glycoprotein domain IPR001480:Bulb-type lectin domain IPR003609:PAN/Apple domain IPR008271:Serine/threonine-protein kinase, active site                                                                        |
| 5B           |      |  | Serine/threonine-protein kinase<br>[Source:UniProtKB/TrEMBL;Acc:W5FIJ2]                                                      | IPR011009:Protein kinase-like domain superfamily IPR017441:Protein kinase, ATP binding site IPR024171:S-receptor-like serine/threonine-protein kinase IPR036426:Bulb-type lectin domain superfamily                                                              |
|              |      |  |                                                                                                                              | IPR001611:Leucine-rich repeat IPR011049:Serralysin-like metalloprotease, C-terminal                                                                                                                                                                              |
|              |      |  |                                                                                                                              | IPR013210:Leucine-rich repeat-containing N-terminal, plant-type IPR032675:Leucine-rich repeat domain superfamily                                                                                                                                                 |
|              |      |  |                                                                                                                              | IPR000719:Protein kinase domain IPR008271:Serine/threonine-protein kinase, active site                                                                                                                                                                           |
|              |      |  |                                                                                                                              | IPR011009:Protein kinase-like domain superfamily                                                                                                                                                                                                                 |
|              |      |  |                                                                                                                              | IPR000719:Protein kinase domain IPR008271:Serine/threonine-protein kinase, active site                                                                                                                                                                           |
|              |      |  |                                                                                                                              | IPR011009:Protein kinase-like domain superfamily                                                                                                                                                                                                                 |
|              |      |  | Sucrose non-fermenting-1-related protein kinase 2.8<br>[Source:UniProtKB/TrEMBL;Acc:W5F978]                                  | IPR000719:Protein kinase domain IPR008271:Serine/threonine-protein kinase, active site                                                                                                                                                                           |
| A.X.94457982 |      |  | Sucrose non-fermenting-1-related protein kinase 2.8                                                                          | IPR011009:Protein kinase-like domain superfamily IPR017441:Protein kinase, ATP binding site                                                                                                                                                                      |
|              |      |  | Protein kinase domain-containing protein                                                                                     | IPR000719:Protein kinase domain IPR008271:Serine/threonine-protein kinase, active site                                                                                                                                                                           |
|              |      |  |                                                                                                                              | IPR011009:Protein kinase-like domain superfamily IPR017441:Protein kinase, ATP binding site                                                                                                                                                                      |
|              |      |  |                                                                                                                              | IPR030616:Aurora kinase                                                                                                                                                                                                                                          |
|              |      |  | Allene oxide synthase, chloroplastic [Source:Projected from Arabidopsis thaliana (AT5G42650) UniProtKB/SwissProt;Acc:Q96242] | IPR001128:Cytochrome P450 IPR002403:Cytochrome P450, E-class, group IV IPR036396:Cytochrome P450 superfamily                                                                                                                                                     |
| 5B           |      |  | Protein DETOXIFICATION<br>[Source:UniProtKB/TrEMBL;Acc:A0A341VJT2]                                                           | IPR002528:Multi antimicrobial extrusion protein                                                                                                                                                                                                                  |

|             |                    |                      |                                                                                                                                                                                                                                                                                                                                                                   |
|-------------|--------------------|----------------------|-------------------------------------------------------------------------------------------------------------------------------------------------------------------------------------------------------------------------------------------------------------------------------------------------------------------------------------------------------------------|
|             | TraesCS5B02G410900 | TraesCS5B02G410900.1 | IPR000719:Protein kinase domain IPR001220:Legume lectin domain IPR008271:Serine/threonine-protein kinase, active site IPR011009:Protein kinase-like domain superfamily IPR013320:Concanavalin A-like lectin/glucanase domain superfamily IPR017441:Protein kinase, ATP binding site                                                                               |
|             | TraesCS5B02G411200 | TraesCS5B02G411200.1 | IPR001128:Cytochrome P450 IPR002401:Cytochrome P450, E-class, group I IPR017972:Cytochrome P450, conserved site IPR036396:Cytochrome P450 superfamily                                                                                                                                                                                                             |
| AX.95126753 | TraesCS5D02G003500 | TraesCS5D02G003500.1 | IPR000008:C2 domain IPR000719:Protein kinase domain IPR008271:Serine/threonine-protein kinase, active site IPR011009:Protein kinase-like domain superfamily IPR017441:Protein kinase, ATP binding site IPR035892:C2 domain superfamily                                                                                                                            |
|             | TraesCS5D02G004900 | TraesCS5D02G004900.1 | IPR001128:Cytochrome P450 IPR002401:Cytochrome P450, E-class, group I IPR017972:Cytochrome P450, conserved site IPR036396:Cytochrome P450 superfamily                                                                                                                                                                                                             |
|             | TraesCS5D02G005300 | TraesCS5D02G005300.1 | IPR000719:Protein kinase domain IPR001611:Leucine-rich repeat IPR002182:NB-ARC IPR008271:Serine/threonine-protein kinase, active site IPR011009:Protein kinase-like domain superfamily IPR017441:Protein kinase, ATP binding site IPR027417:P-loop containing nucleoside triphosphate hydrolase IPR032675:Leucine-rich repeat domain superfamily                  |
|             | TraesCS5D02G005400 | TraesCS5D02G005400.1 | IPR000719:Protein kinase domain IPR002182:NB-ARC IPR003591:Leucine-rich repeat, typical subtype IPR008271:Serine/threonine-protein kinase, active site IPR011009:Protein kinase-like domain superfamily IPR017441:Protein kinase, ATP binding site IPR027417:P-loop containing nucleoside triphosphate hydrolase IPR032675:Leucine-rich repeat domain superfamily |
|             | TraesCS5D02G005416 | TraesCS5D02G005416.1 | IPR001611:Leucine-rich repeat IPR032675:Leucine-rich repeat domain superfamily                                                                                                                                                                                                                                                                                    |
|             | TraesCS5D02G005600 | TraesCS5D02G005600.1 | IPR001611:Leucine-rich repeat IPR002182:NB-ARC IPR025875:Leucine rich repeat 4 IPR027417:P-loop containing nucleoside triphosphate hydrolase IPR032675:Leucine-rich repeat domain superfamily                                                                                                                                                                     |
|             | TraesCS5D02G006200 | TraesCS5D02G006200.1 | IPR001128:Cytochrome P450 IPR002403:Cytochrome P450, E-class, group IV IPR017972:Cytochrome P450, conserved site IPR036396:Cytochrome P450 superfamily                                                                                                                                                                                                            |
|             | TraesCS5D02G006400 | TraesCS5D02G006400.1 | IPR001128:Cytochrome P450 IPR002403:Cytochrome P450, E-class, group IV IPR036396:Cytochrome P450 superfamily                                                                                                                                                                                                                                                      |
|             | TraesCS5D02G006500 | TraesCS5D02G006500.1 | IPR001128:Cytochrome P450 IPR002403:Cytochrome P450, E-class, group IV IPR036396:Cytochrome P450 superfamily                                                                                                                                                                                                                                                      |
|             | TraesCS5D02G006800 | TraesCS5D02G006800.1 | IPR001128:Cytochrome P450 IPR002401:Cytochrome P450, E-class, group I IPR017972:Cytochrome P450, conserved site IPR036396:Cytochrome P450 superfamily                                                                                                                                                                                                             |
|             | TraesCS5D02G006900 | TraesCS5D02G006900.1 | IPR001810:F-box domain IPR032675:Leucine-rich repeat domain superfamily IPR036047:F-box-like domain superfamily                                                                                                                                                                                                                                                   |
|             | TraesCS5D02G007100 | TraesCS5D02G007100.1 | IPR000719:Protein kinase domain IPR008271:Serine/threonine-protein kinase, active site IPR011009:Protein kinase-like domain superfamily IPR017441:Protein kinase, ATP binding site IPR024171:S-receptor-like serine/threonine-protein kinase                                                                                                                      |
|             | TraesCS5D02G007100 | TraesCS5D02G007100.3 | IPR000719:Protein kinase domain IPR008271:Serine/threonine-protein kinase, active site IPR011009:Protein kinase-like domain superfamily IPR017441:Protein kinase, ATP binding site                                                                                                                                                                                |
|             | TraesCS5D02G007100 | TraesCS5D02G007100.2 | IPR000719:Protein kinase domain IPR008271:Serine/threonine-protein kinase, active site IPR011009:Protein kinase-like domain superfamily IPR017441:Protein kinase, ATP binding site                                                                                                                                                                                |

|             |                    |                                                                                                                     |                                                                                                                                                                                                                                                                                                                                                                           |
|-------------|--------------------|---------------------------------------------------------------------------------------------------------------------|---------------------------------------------------------------------------------------------------------------------------------------------------------------------------------------------------------------------------------------------------------------------------------------------------------------------------------------------------------------------------|
|             | TraesCS5D02G007200 | TraesCS5D02G007200.1                                                                                                | IPR000719:Protein kinase domain IPR008271:Serine/threonine-protein kinase, active site<br>IPR011009:Protein kinase-like domain superfamily IPR013210:Leucine-rich repeat-containing N-terminal, plant-type IPR017441:Protein kinase, ATP binding site IPR031071:LRR receptor-like serine/threonine-protein kinase FEI1/2 IPR032675:Leucine-rich repeat domain superfamily |
|             | TraesCS5D02G009100 | TraesCS5D02G009100.1                                                                                                | IPR005797:Cytochrome b/b6, N-terminal IPR016174:Di-haem cytochrome, transmembrane IPR027387:Cytochrome b/b6-like domain superfamily                                                                                                                                                                                                                                       |
|             | TraesCS5D02G011700 | TraesCS5D02G011700.1                                                                                                | IPR001810:F-box domain IPR032675:Leucine-rich repeat domain superfamily IPR036047:F-box-like domain superfamily                                                                                                                                                                                                                                                           |
|             | TraesCS5D02G012000 | TraesCS5D02G012000.1                                                                                                | IPR001128:Cytochrome P450 IPR002403:Cytochrome P450, E-class, group IV IPR036396:Cytochrome P450 superfamily                                                                                                                                                                                                                                                              |
|             | TraesCS5D02G012100 | TraesCS5D02G012100.1                                                                                                | IPR001128:Cytochrome P450 IPR002403:Cytochrome P450, E-class, group IV IPR036396:Cytochrome P450 superfamily                                                                                                                                                                                                                                                              |
|             | TraesCS5D02G012200 | TraesCS5D02G012200.1                                                                                                | IPR036396:Cytochrome P450 superfamily                                                                                                                                                                                                                                                                                                                                     |
|             | TraesCS5D02G012300 | TraesCS5D02G012300.1                                                                                                | IPR001128:Cytochrome P450 IPR002403:Cytochrome P450, E-class, group IV IPR036396:Cytochrome P450 superfamily                                                                                                                                                                                                                                                              |
|             | TraesCS5D02G012300 | TraesCS5D02G012300.2                                                                                                | IPR001128:Cytochrome P450 IPR002403:Cytochrome P450, E-class, group IV IPR036396:Cytochrome P450 superfamily                                                                                                                                                                                                                                                              |
| AX.95086097 | TraesCS6A02G077200 | TraesCS6A02G077200.1                                                                                                | IPR001810:F-box domain IPR036047:F-box-like domain superfamily                                                                                                                                                                                                                                                                                                            |
|             | TraesCS6A02G077600 | TraesCS6A02G077600.1                                                                                                | IPR001810:F-box domain IPR032675:Leucine-rich repeat domain superfamily IPR036047:F-box-like domain superfamily                                                                                                                                                                                                                                                           |
|             | TraesCS6A02G077700 | TraesCS6A02G077700.1                                                                                                | IPR001810:F-box domain IPR006566:FBD domain IPR032675:Leucine-rich repeat domain superfamily IPR036047:F-box-like domain superfamily                                                                                                                                                                                                                                      |
|             | TraesCS6A02G077900 | TraesCS6A02G077900.1                                                                                                | IPR006566:FBD domain IPR032675:Leucine-rich repeat domain superfamily                                                                                                                                                                                                                                                                                                     |
|             | TraesCS6A02G078000 | TraesCS6A02G078000.1                                                                                                | IPR001810:F-box domain IPR006566:FBD domain IPR032675:Leucine-rich repeat domain superfamily IPR036047:F-box-like domain superfamily                                                                                                                                                                                                                                      |
|             | TraesCS6A02G078100 | TraesCS6A02G078100.1                                                                                                | IPR006566:FBD domain IPR032675:Leucine-rich repeat domain superfamily                                                                                                                                                                                                                                                                                                     |
|             | TraesCS6A02G078200 | TraesCS6A02G078200.1                                                                                                | IPR000719:Protein kinase domain IPR008271:Serine/threonine-protein kinase, active site<br>IPR011009:Protein kinase-like domain superfamily IPR017441:Protein kinase, ATP binding site<br>IPR032675:Leucine-rich repeat domain superfamily IPR036047:F-box-like domain superfamily                                                                                         |
|             | TraesCS6A02G078500 | TraesCS6A02G078500.1                                                                                                | IPR000719:Protein kinase domain IPR000858:S-locus glycoprotein domain IPR001245:Serine-threonine/tyrosine-protein kinase, catalytic domain IPR001480:Bulb-type lectin domain                                                                                                                                                                                              |
|             | TraesCS6A02G078700 | TraesCS6A02G078700.1                                                                                                | IPR003609:PAN/Apple domain IPR011009:Protein kinase-like domain superfamily IPR017441:Protein kinase, ATP binding site IPR024171:S-receptor-like serine/threonine-protein kinase IPR036426:Bulb-type lectin domain superfamily                                                                                                                                            |
| 6A          | TraesCS6A02G080100 | TraesCS6A02G080100.1                                                                                                | IPR002182:NB-ARC IPR027417:P-loop containing nucleoside triphosphate hydrolase<br>IPR032675:Leucine-rich repeat domain superfamily                                                                                                                                                                                                                                        |
|             |                    | WRKY DNA-binding protein<br>55 [Source:Projected from<br>Arabidopsis thaliana<br>(AT2G40740)<br>TAIR;Acc:AT2G40740] | IPR003657:WRKY domain IPR036576:WRKY domain superfamily                                                                                                                                                                                                                                                                                                                   |
|             | TraesCS6A02G080500 | TraesCS6A02G080500.1                                                                                                |                                                                                                                                                                                                                                                                                                                                                                           |
|             | TraesCS6A02G081800 | TraesCS6A02G081800.1                                                                                                | Uncharacterized protein<br>IPR001128:Cytochrome P450 IPR002401:Cytochrome P450, E-class, group I IPR017972:Cytochrome P450, conserved site IPR036396:Cytochrome P450 superfamily                                                                                                                                                                                          |

|              |                    |                      |                                                                                                                         |                                                                                                                                                                                                                                                                                                                                                |
|--------------|--------------------|----------------------|-------------------------------------------------------------------------------------------------------------------------|------------------------------------------------------------------------------------------------------------------------------------------------------------------------------------------------------------------------------------------------------------------------------------------------------------------------------------------------|
|              | TraesCS6A02G081900 | TraesCS6A02G081900.1 | Uncharacterized protein                                                                                                 | IPR001128:Cytochrome P450 IPR002401:Cytochrome P450, E-class, group I IPR017972:Cytochrome P450, conserved site IPR036396:Cytochrome P450 superfamily                                                                                                                                                                                          |
|              | TraesCS6A02G082000 | TraesCS6A02G082000.1 |                                                                                                                         | IPR001128:Cytochrome P450 IPR002401:Cytochrome P450, E-class, group I IPR036396:Cytochrome P450 superfamily                                                                                                                                                                                                                                    |
|              | TraesCS6A02G082700 | TraesCS6A02G082700.1 |                                                                                                                         | IPR001810:F-box domain IPR032675:Leucine-rich repeat domain superfamily IPR036047:F-box-like domain superfamily                                                                                                                                                                                                                                |
|              | TraesCS6A02G083500 | TraesCS6A02G083500.1 |                                                                                                                         | IPR001810:F-box domain IPR036047:F-box-like domain superfamily                                                                                                                                                                                                                                                                                 |
|              | TraesCS6A02G083600 | TraesCS6A02G083600.1 |                                                                                                                         | IPR001810:F-box domain IPR036047:F-box-like domain superfamily                                                                                                                                                                                                                                                                                 |
|              | TraesCS6A02G083800 | TraesCS6A02G083800.1 |                                                                                                                         | IPR001128:Cytochrome P450 IPR002401:Cytochrome P450, E-class, group I IPR017972:Cytochrome P450, conserved site IPR036396:Cytochrome P450 superfamily                                                                                                                                                                                          |
| A.X.95019005 | TraesCS6A02G367600 | TraesCS6A02G367600.1 |                                                                                                                         | IPR001810:F-box domain IPR036047:F-box-like domain superfamily                                                                                                                                                                                                                                                                                 |
|              | TraesCS6A02G369100 | TraesCS6A02G369100.2 |                                                                                                                         | IPR032675:Leucine-rich repeat domain superfamily IPR036047:F-box-like domain superfamily                                                                                                                                                                                                                                                       |
|              | TraesCS6A02G369100 | TraesCS6A02G369100.1 |                                                                                                                         | IPR032675:Leucine-rich repeat domain superfamily IPR036047:F-box-like domain superfamily                                                                                                                                                                                                                                                       |
|              | TraesCS6A02G369600 | TraesCS6A02G369600.1 |                                                                                                                         | IPR001810:F-box domain IPR032675:Leucine-rich repeat domain superfamily IPR036047:F-box-like domain superfamily                                                                                                                                                                                                                                |
|              | TraesCS6A02G369700 | TraesCS6A02G369700.1 |                                                                                                                         | IPR001128:Cytochrome P450 IPR002401:Cytochrome P450, E-class, group I IPR017972:Cytochrome P450, conserved site IPR036396:Cytochrome P450 superfamily                                                                                                                                                                                          |
|              | TraesCS6A02G370000 | TraesCS6A02G370000.1 |                                                                                                                         | IPR032675:Leucine-rich repeat domain superfamily IPR036047:F-box-like domain superfamily                                                                                                                                                                                                                                                       |
|              | TraesCS6A02G370200 | TraesCS6A02G370200.1 |                                                                                                                         | IPR001810:F-box domain IPR032675:Leucine-rich repeat domain superfamily IPR036047:F-box-like domain superfamily                                                                                                                                                                                                                                |
|              | TraesCS6A02G370400 | TraesCS6A02G370400.1 |                                                                                                                         | IPR032675:Leucine-rich repeat domain superfamily                                                                                                                                                                                                                                                                                               |
|              | TraesCS6A02G370700 | TraesCS6A02G370700.2 |                                                                                                                         | IPR001810:F-box domain IPR032675:Leucine-rich repeat domain superfamily IPR036047:F-box-like domain superfamily                                                                                                                                                                                                                                |
|              | TraesCS6A02G371600 | TraesCS6A02G371600.1 |                                                                                                                         | IPR001810:F-box domain IPR036047:F-box-like domain superfamily                                                                                                                                                                                                                                                                                 |
|              | TraesCS6A02G371900 | TraesCS6A02G371900.1 |                                                                                                                         | IPR032675:Leucine-rich repeat domain superfamily                                                                                                                                                                                                                                                                                               |
|              | TraesCS6A02G372800 | TraesCS6A02G372800.1 |                                                                                                                         | IPR032675:Leucine-rich repeat domain superfamily                                                                                                                                                                                                                                                                                               |
|              | TraesCS6A02G373100 | TraesCS6A02G373100.1 |                                                                                                                         | IPR001810:F-box domain IPR032675:Leucine-rich repeat domain superfamily IPR036047:F-box-like domain superfamily                                                                                                                                                                                                                                |
|              | TraesCS6A02G373600 | TraesCS6A02G373600.1 |                                                                                                                         | IPR013187:F-box associated domain, type 3 IPR017451:F-box associated interaction domain IPR036047:F-box-like domain superfamily                                                                                                                                                                                                                |
|              | TraesCS6A02G374100 | TraesCS6A02G374100.1 | Protein kinase superfamily protein [Source:Projected from Arabidopsis thaliana (AT2G39190) UniProtKB/TrEMBL;Acc:O80962] | IPR000719:Protein kinase domain IPR002575:Aminoglycoside phosphotransferase IPR004147:UbiB domain IPR011009:Protein kinase-like domain superfamily                                                                                                                                                                                             |
|              | TraesCS6A02G374700 | TraesCS6A02G374700.1 | IRE1 [Source:UniProtKB/TrEMBL;Acc:A0A2C9PG52] IRE1                                                                      | IPR000719:Protein kinase domain IPR008271:Serine/threonine-protein kinase, active site IPR010513:KEN domain IPR011009:Protein kinase-like domain superfamily IPR011047:Quinoprotein alcohol dehydrogenase-like superfamily IPR015943:WD40/YVTN repeat-like-containing domain superfamily IPR018997:PUB domain IPR038357:KEN domain superfamily |
| A.X.95097189 | TraesCS6B02G067400 | TraesCS6B02G067400.1 |                                                                                                                         | IPR001810:F-box domain IPR036047:F-box-like domain superfamily                                                                                                                                                                                                                                                                                 |
|              | TraesCS6B02G067500 | TraesCS6B02G067500.1 |                                                                                                                         | IPR032675:Leucine-rich repeat domain superfamily                                                                                                                                                                                                                                                                                               |
|              | TraesCS6B02G067700 | TraesCS6B02G067700.1 |                                                                                                                         | IPR001810:F-box domain IPR032675:Leucine-rich repeat domain superfamily IPR036047:F-box-like domain superfamily                                                                                                                                                                                                                                |

|                    |                      |                                                                                                                                                                                                                                                                                                                               |
|--------------------|----------------------|-------------------------------------------------------------------------------------------------------------------------------------------------------------------------------------------------------------------------------------------------------------------------------------------------------------------------------|
| TraesCS6B02G067800 | TraesCS6B02G067800.1 | IPR000719:Protein kinase domain IPR008271:Serine/threonine-protein kinase, active site<br>IPR011009:Protein kinase-like domain superfamily IPR017441:Protein kinase, ATP binding site<br>IPR036537:Adaptor protein Cbl, N-terminal domain superfamily                                                                         |
| TraesCS6B02G069300 | TraesCS6B02G069300.2 | IPR000719:Protein kinase domain IPR001245:Serine-threonine/tyrosine-protein kinase, catalytic domain IPR011009:Protein kinase-like domain superfamily                                                                                                                                                                         |
| TraesCS6B02G069300 | TraesCS6B02G069300.1 | IPR000719:Protein kinase domain IPR001245:Serine-threonine/tyrosine-protein kinase, catalytic domain IPR011009:Protein kinase-like domain superfamily                                                                                                                                                                         |
| TraesCS6B02G069300 | TraesCS6B02G069300.3 | IPR000719:Protein kinase domain IPR001245:Serine-threonine/tyrosine-protein kinase, catalytic domain IPR011009:Protein kinase-like domain superfamily                                                                                                                                                                         |
| TraesCS6B02G069300 | TraesCS6B02G069300.4 | IPR000719:Protein kinase domain IPR001245:Serine-threonine/tyrosine-protein kinase, catalytic domain IPR011009:Protein kinase-like domain superfamily                                                                                                                                                                         |
| TraesCS6B02G069400 | TraesCS6B02G069400.2 | IPR002182:NB-ARC IPR027417:P-loop containing nucleoside triphosphate hydrolase<br>IPR027806:Harbinger transposase-derived nuclease domain IPR032675:Leucine-rich repeat domain superfamily IPR038005:Virus X resistance protein-like, coiled-coil domain IPR041118:Rx, N-terminal                                             |
| TraesCS6B02G069400 | TraesCS6B02G069400.3 | IPR002182:NB-ARC IPR027417:P-loop containing nucleoside triphosphate hydrolase<br>IPR027806:Harbinger transposase-derived nuclease domain IPR032675:Leucine-rich repeat domain superfamily                                                                                                                                    |
| TraesCS6B02G069400 | TraesCS6B02G069400.1 | IPR002182:NB-ARC IPR027417:P-loop containing nucleoside triphosphate hydrolase<br>IPR032675:Leucine-rich repeat domain superfamily IPR038005:Virus X resistance protein-like, coiled-coil domain IPR041118:Rx, N-terminal                                                                                                     |
| TraesCS6B02G069500 | TraesCS6B02G069500.1 | IPR002182:NB-ARC IPR003591:Leucine-rich repeat, typical subtype IPR027417:P-loop containing nucleoside triphosphate hydrolase IPR027806:Harbinger transposase-derived nuclease domain IPR032675:Leucine-rich repeat domain superfamily IPR038005:Virus X resistance protein-like, coiled-coil domain IPR041118:Rx, N-terminal |
| TraesCS6B02G069700 | TraesCS6B02G069700.1 | IPR002182:NB-ARC IPR027417:P-loop containing nucleoside triphosphate hydrolase IPR038005:Virus X resistance protein-like, coiled-coil domain IPR041118:Rx, N-terminal                                                                                                                                                         |
| TraesCS6B02G069700 | TraesCS6B02G069700.2 | IPR002182:NB-ARC IPR027417:P-loop containing nucleoside triphosphate hydrolase IPR038005:Virus X resistance protein-like, coiled-coil domain IPR041118:Rx, N-terminal                                                                                                                                                         |
| TraesCS6B02G069800 | TraesCS6B02G069800.1 | IPR000719:Protein kinase domain IPR001245:Serine-threonine/tyrosine-protein kinase, catalytic domain IPR008271:Serine/threonine-protein kinase, active site IPR011009:Protein kinase-like domain superfamily IPR017441:Protein kinase, ATP binding site                                                                       |
| TraesCS6B02G069900 | TraesCS6B02G069900.2 | IPR002182:NB-ARC IPR003591:Leucine-rich repeat, typical subtype IPR027417:P-loop containing nucleoside triphosphate hydrolase IPR027806:Harbinger transposase-derived nuclease domain IPR032675:Leucine-rich repeat domain superfamily IPR038005:Virus X resistance protein-like, coiled-coil domain IPR041118:Rx, N-terminal |
| TraesCS6B02G069900 | TraesCS6B02G069900.1 | IPR002182:NB-ARC IPR003591:Leucine-rich repeat, typical subtype IPR027417:P-loop containing nucleoside triphosphate hydrolase IPR027806:Harbinger transposase-derived nuclease domain IPR032675:Leucine-rich repeat domain superfamily IPR038005:Virus X resistance protein-like, coiled-coil domain IPR041118:Rx, N-terminal |
| TraesCS6B02G070200 | TraesCS6B02G070200.1 | IPR002182:NB-ARC IPR003591:Leucine-rich repeat, typical subtype IPR027417:P-loop containing nucleoside triphosphate hydrolase IPR032675:Leucine-rich repeat domain superfamily IPR038005:Virus X resistance protein-like, coiled-coil domain IPR041118:Rx, N-terminal                                                         |

|                    |                      |                                                                                                                                                                                                                                                                                                                                                                                                              |
|--------------------|----------------------|--------------------------------------------------------------------------------------------------------------------------------------------------------------------------------------------------------------------------------------------------------------------------------------------------------------------------------------------------------------------------------------------------------------|
| TraesCS6B02G070300 | TraesCS6B02G070300.1 | IPR002182:NB-ARC IPR027417:P-loop containing nucleoside triphosphate hydrolase<br>IPR032675:Leucine-rich repeat domain superfamily                                                                                                                                                                                                                                                                           |
| TraesCS6B02G070400 | TraesCS6B02G070400.1 | IPR002182:NB-ARC IPR027417:P-loop containing nucleoside triphosphate hydrolase<br>IPR027806:Harbinger transposase-derived nuclease domain IPR032675:Leucine-rich repeat domain<br>superfamily IPR038005:Virus X resistance protein-like, coiled-coil domain IPR041118:Rx, N-terminal                                                                                                                         |
| TraesCS6B02G070500 | TraesCS6B02G070500.2 | IPR002182:NB-ARC IPR003591:Leucine-rich repeat, typical subtype IPR027417:P-loop containing<br>nucleoside triphosphate hydrolase IPR027806:Harbinger transposase-derived nuclease domain<br>IPR032675:Leucine-rich repeat domain superfamily IPR038005:Virus X resistance protein-like, coiled-<br>coil domain IPR041118:Rx, N-terminal                                                                      |
| TraesCS6B02G070500 | TraesCS6B02G070500.1 | IPR002182:NB-ARC IPR003591:Leucine-rich repeat, typical subtype IPR027417:P-loop containing<br>nucleoside triphosphate hydrolase IPR027806:Harbinger transposase-derived nuclease domain<br>IPR032675:Leucine-rich repeat domain superfamily IPR038005:Virus X resistance protein-like, coiled-<br>coil domain IPR041118:Rx, N-terminal                                                                      |
| TraesCS6B02G070700 | TraesCS6B02G070700.1 | IPR002182:NB-ARC IPR003591:Leucine-rich repeat, typical subtype IPR027417:P-loop containing<br>nucleoside triphosphate hydrolase IPR027806:Harbinger transposase-derived nuclease domain<br>IPR032675:Leucine-rich repeat domain superfamily                                                                                                                                                                 |
| TraesCS6B02G070800 | TraesCS6B02G070800.1 | IPR038005:Virus X resistance protein-like, coiled-coil domain IPR041118:Rx, N-terminal                                                                                                                                                                                                                                                                                                                       |
| TraesCS6B02G070900 | TraesCS6B02G070900.3 | IPR002182:NB-ARC IPR003591:Leucine-rich repeat, typical subtype IPR027417:P-loop containing<br>nucleoside triphosphate hydrolase IPR032675:Leucine-rich repeat domain superfamily                                                                                                                                                                                                                            |
| TraesCS6B02G070900 | TraesCS6B02G070900.1 | IPR002182:NB-ARC IPR003591:Leucine-rich repeat, typical subtype IPR027417:P-loop containing<br>nucleoside triphosphate hydrolase IPR027806:Harbinger transposase-derived nuclease domain<br>IPR032675:Leucine-rich repeat domain superfamily IPR038005:Virus X resistance protein-like, coiled-<br>coil domain IPR041118:Rx, N-terminal                                                                      |
| TraesCS6B02G070900 | TraesCS6B02G070900.2 | IPR002182:NB-ARC IPR003591:Leucine-rich repeat, typical subtype IPR027417:P-loop containing<br>nucleoside triphosphate hydrolase IPR027806:Harbinger transposase-derived nuclease domain<br>IPR032675:Leucine-rich repeat domain superfamily IPR038005:Virus X resistance protein-like, coiled-<br>coil domain IPR041118:Rx, N-terminal                                                                      |
| TraesCS6B02G071000 | TraesCS6B02G071000.1 | IPR000719:Protein kinase domain IPR001611:Leucine-rich repeat IPR003591:Leucine-rich repeat,<br>typical subtype IPR008271:Serine/threonine-protein kinase, active site IPR011009:Protein kinase-like<br>domain superfamily IPR013210:Leucine-rich repeat-containing N-terminal, plant-type<br>IPR017441:Protein kinase, ATP binding site IPR032675:Leucine-rich repeat domain superfamily                    |
| TraesCS6B02G071200 | TraesCS6B02G071200.1 | IPR000823:Plant peroxidase IPR002016:Haem peroxidase IPR010255:Haem peroxidase superfamily<br>IPR019793:Peroxidases haem-ligand binding site IPR019794:Peroxidase, active site                                                                                                                                                                                                                               |
| TraesCS6B02G072700 | TraesCS6B02G072700.1 | IPR033905:Secretory peroxidase<br>IPR001810:F-box domain IPR036047:F-box-like domain superfamily                                                                                                                                                                                                                                                                                                             |
| TraesCS6B02G073000 | TraesCS6B02G073000.1 | IPR000719:Protein kinase domain IPR000742:EGF-like domain IPR001881:EGF-like calcium-binding<br>domain IPR008271:Serine/threonine-protein kinase, active site IPR009030:Growth factor receptor<br>cysteine-rich domain superfamily IPR011009:Protein kinase-like domain superfamily<br>IPR017441:Protein kinase, ATP binding site IPR025287:Wall-associated receptor kinase, galacturonan-<br>binding domain |

Peroxidase

TraesCS6B02G071200 TraesCS6B02G071200.1 [Source:UniProtKB/TrEMBL;Accession:A0A1D6B2B4]

|    |             |                    |                                                                                                                                                 |                                                                                                                                                                                                                                                                                                                                                                                               |                                                                                                                                                                                                                                                                                                                                       |
|----|-------------|--------------------|-------------------------------------------------------------------------------------------------------------------------------------------------|-----------------------------------------------------------------------------------------------------------------------------------------------------------------------------------------------------------------------------------------------------------------------------------------------------------------------------------------------------------------------------------------------|---------------------------------------------------------------------------------------------------------------------------------------------------------------------------------------------------------------------------------------------------------------------------------------------------------------------------------------|
| 6B | AX.94407285 | TraesCS6B02G199500 | TraesCS6B02G199500.1                                                                                                                            | IPR000719:Protein kinase domain IPR001611:Leucine-rich repeat IPR003591:Leucine-rich repeat, typical subtype IPR011009:Protein kinase-like domain superfamily IPR013210:Leucine-rich repeat-containing N-terminal, plant-type IPR032675:Leucine-rich repeat domain superfamily                                                                                                                |                                                                                                                                                                                                                                                                                                                                       |
|    |             | TraesCS6B02G200100 | TraesCS6B02G200100.1                                                                                                                            | IPR000719:Protein kinase domain IPR001245:Serine-threonine/tyrosine-protein kinase, catalytic domain IPR008271:Serine/threonine-protein kinase, active site IPR011009:Protein kinase-like domain superfamily                                                                                                                                                                                  |                                                                                                                                                                                                                                                                                                                                       |
|    |             | TraesCS6B02G200700 | TraesCS6B02G200700.1                                                                                                                            | IPR001810:F-box domain IPR006566:FBD domain IPR036047:F-box-like domain superfamily                                                                                                                                                                                                                                                                                                           |                                                                                                                                                                                                                                                                                                                                       |
|    | AX.94978939 | TraesCS7A02G455300 | TraesCS7A02G455300.1<br>Cytochrome P450 like protein<br>[Source:Projected from Arabidopsis thaliana (AT1G11600)<br>UniProtKB/TrEMBL;Acc:Q9SAB7] | IPR001128:Cytochrome P450 IPR002401:Cytochrome P450, E-class, group I IPR017972:Cytochrome P450, conserved site IPR036396:Cytochrome P450 superfamily                                                                                                                                                                                                                                         |                                                                                                                                                                                                                                                                                                                                       |
| 7A |             | TraesCS7A02G455700 | TraesCS7A02G455700.1                                                                                                                            | IPR000719:Protein kinase domain IPR008271:Serine/threonine-protein kinase, active site IPR011009:Protein kinase-like domain superfamily                                                                                                                                                                                                                                                       |                                                                                                                                                                                                                                                                                                                                       |
|    |             | TraesCS7A02G455800 | TraesCS7A02G455800.1<br>Serine/threonine-protein kinase<br>[Source:UniProtKB/TrEMBL;Acc:A0A1D6BQ19]                                             | IPR000719:Protein kinase domain IPR000858:S-locus glycoprotein domain IPR001480:Bulb-type lectin domain IPR003609:PAN/Apple domain IPR008271:Serine/threonine-protein kinase, active site IPR011009:Protein kinase-like domain superfamily IPR017441:Protein kinase, ATP binding site IPR024171:S-receptor-like serine/threonine-protein kinase IPR036426:Bulb-type lectin domain superfamily |                                                                                                                                                                                                                                                                                                                                       |
|    |             | TraesCS7A02G456100 | TraesCS7A02G456100.1                                                                                                                            | IPR000719:Protein kinase domain IPR000858:S-locus glycoprotein domain IPR001245:Serine-threonine/tyrosine-protein kinase, catalytic domain IPR001480:Bulb-type lectin domain IPR003609:PAN/Apple domain IPR011009:Protein kinase-like domain superfamily IPR017441:Protein kinase, ATP binding site IPR036426:Bulb-type lectin domain superfamily                                             |                                                                                                                                                                                                                                                                                                                                       |
|    |             | TraesCS7A02G456200 | TraesCS7A02G456200.1                                                                                                                            | IPR000719:Protein kinase domain IPR008271:Serine/threonine-protein kinase, active site IPR011009:Protein kinase-like domain superfamily                                                                                                                                                                                                                                                       |                                                                                                                                                                                                                                                                                                                                       |
|    |             | TraesCS7A02G456300 | TraesCS7A02G456300.1                                                                                                                            | IPR000719:Protein kinase domain IPR000858:S-locus glycoprotein domain IPR001480:Bulb-type lectin domain IPR003609:PAN/Apple domain IPR008271:Serine/threonine-protein kinase, active site IPR011009:Protein kinase-like domain superfamily IPR017441:Protein kinase, ATP binding site IPR024171:S-receptor-like serine/threonine-protein kinase IPR036426:Bulb-type lectin domain superfamily |                                                                                                                                                                                                                                                                                                                                       |
|    |             | TraesCS7A02G456800 | TraesCS7A02G456800.1                                                                                                                            | IPR000719:Protein kinase domain IPR000858:S-locus glycoprotein domain IPR001245:Serine-threonine/tyrosine-protein kinase, catalytic domain IPR001480:Bulb-type lectin domain IPR003609:PAN/Apple domain IPR011009:Protein kinase-like domain superfamily IPR036426:Bulb-type lectin domain superfamily                                                                                        |                                                                                                                                                                                                                                                                                                                                       |
|    |             | TraesCS7A02G456900 | TraesCS7A02G456900.1                                                                                                                            | IPR011009:Protein kinase-like domain superfamily                                                                                                                                                                                                                                                                                                                                              |                                                                                                                                                                                                                                                                                                                                       |
|    |             | TraesCS7A02G457500 | TraesCS7A02G457500.1                                                                                                                            | IPR032675:Leucine-rich repeat domain superfamily                                                                                                                                                                                                                                                                                                                                              |                                                                                                                                                                                                                                                                                                                                       |
|    |             | AX.94535772        | TraesCS7B02G045500                                                                                                                              | TraesCS7B02G045500.1                                                                                                                                                                                                                                                                                                                                                                          | IPR001611:Leucine-rich repeat IPR003591:Leucine-rich repeat, typical subtype IPR013210:Leucine-rich repeat-containing N-terminal, plant-type IPR032675:Leucine-rich repeat domain superfamily                                                                                                                                         |
|    |             |                    | TraesCS7B02G045600                                                                                                                              | TraesCS7B02G045600.1                                                                                                                                                                                                                                                                                                                                                                          | IPR000719:Protein kinase domain IPR001611:Leucine-rich repeat IPR003591:Leucine-rich repeat, typical subtype IPR008271:Serine/threonine-protein kinase, active site IPR011009:Protein kinase-like domain superfamily IPR013210:Leucine-rich repeat-containing N-terminal, plant-type IPR032675:Leucine-rich repeat domain superfamily |



|      |                    |                      |                                                                                                                                                                                                                                                                              |
|------|--------------------|----------------------|------------------------------------------------------------------------------------------------------------------------------------------------------------------------------------------------------------------------------------------------------------------------------|
|      | TraesCS7B02G047300 | TraesCS7B02G047300.4 | IPR000719:Protein kinase domain IPR001245:Serine-threonine/tyrosine-protein kinase, catalytic domain IPR008271:Serine/threonine-protein kinase, active site IPR011009:Protein kinase-like domain superfamily IPR017441:Protein kinase, ATP binding site                      |
| 7B   | TraesCS7B02G047300 | TraesCS7B02G047300.1 | IPR000270:PB1 domain IPR000719:Protein kinase domain IPR001245:Serine-threonine/tyrosine-protein kinase, catalytic domain IPR008271:Serine/threonine-protein kinase, active site IPR011009:Protein kinase-like domain superfamily IPR017441:Protein kinase, ATP binding site |
|      | TraesCS7B02G047300 | TraesCS7B02G047300.3 | IPR000719:Protein kinase domain IPR001245:Serine-threonine/tyrosine-protein kinase, catalytic domain IPR008271:Serine/threonine-protein kinase, active site IPR011009:Protein kinase-like domain superfamily IPR017441:Protein kinase, ATP binding site                      |
|      | TraesCS7B02G047300 | TraesCS7B02G047300.2 | IPR000270:PB1 domain IPR000719:Protein kinase domain IPR001245:Serine-threonine/tyrosine-protein kinase, catalytic domain IPR008271:Serine/threonine-protein kinase, active site IPR011009:Protein kinase-like domain superfamily IPR017441:Protein kinase, ATP binding site |
|      | TraesCS7B02G048900 | TraesCS7B02G048900.1 | IPR000719:Protein kinase domain IPR001245:Serine-threonine/tyrosine-protein kinase, catalytic domain IPR008271:Serine/threonine-protein kinase, active site IPR011009:Protein kinase-like domain superfamily IPR017441:Protein kinase, ATP binding site                      |
| #N/A | TraesCS7B02G434800 | TraesCS7B02G434800.1 | IPR001810:F-box domain IPR006566:FBD domain IPR032675:Leucine-rich repeat domain superfamily IPR036047:F-box-like domain superfamily                                                                                                                                         |
|      | TraesCS7B02G434900 | TraesCS7B02G434900.1 | IPR006566:FBD domain IPR032675:Leucine-rich repeat domain superfamily IPR036047:F-box-like domain superfamily                                                                                                                                                                |
|      | TraesCS7B02G435000 | TraesCS7B02G435000.1 | IPR032675:Leucine-rich repeat domain superfamily IPR036047:F-box-like domain superfamily                                                                                                                                                                                     |
|      | TraesCS7B02G435100 | TraesCS7B02G435100.1 | IPR006566:FBD domain IPR032675:Leucine-rich repeat domain superfamily IPR036047:F-box-like domain superfamily                                                                                                                                                                |
|      | TraesCS7B02G435200 | TraesCS7B02G435200.1 | IPR006566:FBD domain IPR032675:Leucine-rich repeat domain superfamily IPR036047:F-box-like domain superfamily                                                                                                                                                                |
|      | TraesCS7B02G436300 | TraesCS7B02G436300.1 | IPR032675:Leucine-rich repeat domain superfamily                                                                                                                                                                                                                             |
|      | TraesCS7B02G437300 | TraesCS7B02G437300.1 | IPR002182:NB-ARC IPR008480:Protein of unknown function DUF761, plant IPR027417:P-loop containing nucleoside triphosphate hydrolase IPR032675:Leucine-rich repeat domain superfamily IPR038005:Virus X resistance protein-like, coiled-coil domain IPR041118:Rx, N-terminal   |
|      | TraesCS7B02G437300 | TraesCS7B02G437300.2 | IPR002182:NB-ARC IPR027417:P-loop containing nucleoside triphosphate hydrolase IPR032675:Leucine-rich repeat domain superfamily IPR038005:Virus X resistance protein-like, coiled-coil domain IPR041118:Rx, N-terminal                                                       |
|      | TraesCS7B02G437300 | TraesCS7B02G437300.3 | IPR002182:NB-ARC IPR027417:P-loop containing nucleoside triphosphate hydrolase IPR032675:Leucine-rich repeat domain superfamily IPR038005:Virus X resistance protein-like, coiled-coil domain IPR041118:Rx, N-terminal                                                       |
|      | TraesCS7B02G437400 | TraesCS7B02G437400.1 | IPR002182:NB-ARC IPR027417:P-loop containing nucleoside triphosphate hydrolase IPR032675:Leucine-rich repeat domain superfamily IPR041118:Rx, N-terminal                                                                                                                     |
|      | TraesCS7B02G437800 | TraesCS7B02G437800.1 | Cytochrome P450<br>[Source:UniProtKB/TrEMBL;Accession:Q9AVM3] Cytochrome P450<br>IPR001128:Cytochrome P450 IPR002401:Cytochrome P450, E-class, group I IPR017972:Cytochrome P450, conserved site IPR036396:Cytochrome P450 superfamily                                       |
|      | TraesCS7B02G438400 | TraesCS7B02G438400.1 | IPR001128:Cytochrome P450 IPR002401:Cytochrome P450, E-class, group I IPR017972:Cytochrome P450, conserved site IPR036396:Cytochrome P450 superfamily                                                                                                                        |
|      | TraesCS7B02G438500 | TraesCS7B02G438500.1 | IPR001128:Cytochrome P450 IPR002401:Cytochrome P450, E-class, group I IPR017972:Cytochrome P450, conserved site IPR036396:Cytochrome P450 superfamily                                                                                                                        |

7B

|                    |                      |                                                                                                                                                                                                                                 |                                                                                                                                                                                                                        |
|--------------------|----------------------|---------------------------------------------------------------------------------------------------------------------------------------------------------------------------------------------------------------------------------|------------------------------------------------------------------------------------------------------------------------------------------------------------------------------------------------------------------------|
| TraesCS7B02G438600 | TraesCS7B02G438600.1 | IPR001128:Cytochrome P450 IPR002401:Cytochrome P450, E-class, group I IPR017972:Cytochrome P450, conserved site IPR036396:Cytochrome P450 superfamily                                                                           |                                                                                                                                                                                                                        |
| TraesCS7B02G438700 | TraesCS7B02G438700.1 | IPR001128:Cytochrome P450 IPR002401:Cytochrome P450, E-class, group I IPR017972:Cytochrome P450, conserved site IPR036396:Cytochrome P450 superfamily                                                                           |                                                                                                                                                                                                                        |
| TraesCS7B02G438900 | TraesCS7B02G438900.1 | IPR001128:Cytochrome P450 IPR002401:Cytochrome P450, E-class, group I IPR017972:Cytochrome P450, conserved site IPR036396:Cytochrome P450 superfamily                                                                           |                                                                                                                                                                                                                        |
| TraesCS7B02G439000 | TraesCS7B02G439000.1 | IPR001128:Cytochrome P450 IPR002401:Cytochrome P450, E-class, group I IPR017972:Cytochrome P450, conserved site IPR036396:Cytochrome P450 superfamily                                                                           |                                                                                                                                                                                                                        |
| TraesCS7B02G439300 | TraesCS7B02G439300.1 | IPR001128:Cytochrome P450 IPR002401:Cytochrome P450, E-class, group I IPR017972:Cytochrome P450, conserved site IPR036396:Cytochrome P450 superfamily                                                                           |                                                                                                                                                                                                                        |
| TraesCS7B02G439400 | TraesCS7B02G439400.1 | IPR001128:Cytochrome P450 IPR002401:Cytochrome P450, E-class, group I IPR017972:Cytochrome P450, conserved site IPR036396:Cytochrome P450 superfamily                                                                           |                                                                                                                                                                                                                        |
| TraesCS7B02G439700 | TraesCS7B02G439700.1 | IPR001128:Cytochrome P450 IPR002401:Cytochrome P450, E-class, group I IPR017972:Cytochrome P450, conserved site IPR036396:Cytochrome P450 superfamily                                                                           |                                                                                                                                                                                                                        |
| TraesCS7B02G439800 | TraesCS7B02G439800.1 | IPR001128:Cytochrome P450 IPR002401:Cytochrome P450, E-class, group I IPR017972:Cytochrome P450, conserved site IPR036396:Cytochrome P450 superfamily                                                                           |                                                                                                                                                                                                                        |
| TraesCS7B02G440000 | TraesCS7B02G440000.2 | IPR000719:Protein kinase domain IPR001245:Serine-threonine/tyrosine-protein kinase, catalytic domain IPR011009:Protein kinase-like domain superfamily                                                                           |                                                                                                                                                                                                                        |
| TraesCS7B02G440000 | TraesCS7B02G440000.1 | IPR000719:Protein kinase domain IPR001245:Serine-threonine/tyrosine-protein kinase, catalytic domain IPR011009:Protein kinase-like domain superfamily                                                                           |                                                                                                                                                                                                                        |
| TraesCS7B02G440600 | TraesCS7B02G440600.1 | IPR001128:Cytochrome P450 IPR002401:Cytochrome P450, E-class, group I IPR017972:Cytochrome P450, conserved site IPR036396:Cytochrome P450 superfamily                                                                           |                                                                                                                                                                                                                        |
| TraesCS7B02G440700 | TraesCS7B02G440700.1 | IPR001128:Cytochrome P450 IPR036396:Cytochrome P450 superfamily                                                                                                                                                                 |                                                                                                                                                                                                                        |
| TraesCS7B02G440800 | TraesCS7B02G440800.2 | IPR032675:Leucine-rich repeat domain superfamily                                                                                                                                                                                |                                                                                                                                                                                                                        |
| TraesCS7B02G440800 | TraesCS7B02G440800.1 | IPR032675:Leucine-rich repeat domain superfamily                                                                                                                                                                                |                                                                                                                                                                                                                        |
| TraesCS7B02G440900 | TraesCS7B02G440900.1 | IPR001128:Cytochrome P450 IPR002401:Cytochrome P450, E-class, group I IPR017972:Cytochrome P450, conserved site IPR036396:Cytochrome P450 superfamily                                                                           |                                                                                                                                                                                                                        |
| TraesCS7B02G441100 | TraesCS7B02G441100.1 | IPR001128:Cytochrome P450 IPR002401:Cytochrome P450, E-class, group I IPR017972:Cytochrome P450, conserved site IPR036396:Cytochrome P450 superfamily                                                                           |                                                                                                                                                                                                                        |
| TraesCS7B02G441200 | TraesCS7B02G441200.1 | IPR000719:Protein kinase domain IPR001611:Leucine-rich repeat IPR011009:Protein kinase-like domain superfamily IPR013210:Leucine-rich repeat-containing N-terminal, plant-type IPR032675:Leucine-rich repeat domain superfamily |                                                                                                                                                                                                                        |
| AX.94860625        | TraesCS7D02G539900   | TraesCS7D02G539900.1                                                                                                                                                                                                            | IPR001810:F-box domain IPR005174:Domain unknown function DUF295 IPR036047:F-box-like domain superfamily                                                                                                                |
|                    | TraesCS7D02G540000   | TraesCS7D02G540000.1                                                                                                                                                                                                            | IPR038005:Virus X resistance protein-like, coiled-coil domain IPR041118:Rx, N-terminal                                                                                                                                 |
|                    | TraesCS7D02G540100   | TraesCS7D02G540100.1                                                                                                                                                                                                            | IPR001810:F-box domain IPR005174:Domain unknown function DUF295 IPR036047:F-box-like domain superfamily                                                                                                                |
|                    | TraesCS7D02G540500   | TraesCS7D02G540500.1                                                                                                                                                                                                            | IPR002182:NB-ARC IPR027417:P-loop containing nucleoside triphosphate hydrolase IPR032675:Leucine-rich repeat domain superfamily IPR038005:Virus X resistance protein-like, coiled-coil domain IPR041118:Rx, N-terminal |
|                    | TraesCS7D02G540600   | TraesCS7D02G540600.1                                                                                                                                                                                                            | IPR002182:NB-ARC IPR027417:P-loop containing nucleoside triphosphate hydrolase IPR038005:Virus X resistance protein-like, coiled-coil domain IPR041118:Rx, N-terminal                                                  |

7D

|                    |                      | Protein DETOXIFICATION                                                                                                                                                                                                                                                                                                                                                                                                                                                                                 |
|--------------------|----------------------|--------------------------------------------------------------------------------------------------------------------------------------------------------------------------------------------------------------------------------------------------------------------------------------------------------------------------------------------------------------------------------------------------------------------------------------------------------------------------------------------------------|
| TraesCS7D02G541200 | TraesCS7D02G541200.1 | [Source:UniProtKB/TrEMBL;A IPR002528:Multi antimicrobial extrusion protein cc:W5HZB8]                                                                                                                                                                                                                                                                                                                                                                                                                  |
|                    |                      | Protein DETOXIFICATION                                                                                                                                                                                                                                                                                                                                                                                                                                                                                 |
| TraesCS7D02G541800 | TraesCS7D02G541800.1 | [Source:UniProtKB/TrEMBL;A IPR002528:Multi antimicrobial extrusion protein cc:A0A341Z7X7]                                                                                                                                                                                                                                                                                                                                                                                                              |
| TraesCS7D02G542100 | TraesCS7D02G542100.1 | IPR032675:Leucine-rich repeat domain superfamily                                                                                                                                                                                                                                                                                                                                                                                                                                                       |
| TraesCS7D02G542200 | TraesCS7D02G542200.1 | IPR002182:NB-ARC IPR027417:P-loop containing nucleoside triphosphate hydrolase IPR032675:Leucine-rich repeat domain superfamily IPR036388:Winged helix-like DNA-binding domain superfamily                                                                                                                                                                                                                                                                                                             |
| TraesCS7D02G542300 | TraesCS7D02G542300.1 | IPR002182:NB-ARC IPR027417:P-loop containing nucleoside triphosphate hydrolase IPR038005:Virus X resistance protein-like, coiled-coil domain IPR041118:Rx, N-terminal                                                                                                                                                                                                                                                                                                                                  |
| TraesCS7D02G542500 | TraesCS7D02G542500.1 | IPR032675:Leucine-rich repeat domain superfamily                                                                                                                                                                                                                                                                                                                                                                                                                                                       |
| TraesCS7D02G542600 | TraesCS7D02G542600.1 | IPR001611:Leucine-rich repeat IPR003591:Leucine-rich repeat, typical subtype IPR013210:Leucine-rich repeat-containing N-terminal, plant-type IPR032675:Leucine-rich repeat domain superfamily IPR000719:Protein kinase domain IPR001611:Leucine-rich repeat IPR003591:Leucine-rich repeat, typical subtype IPR008266:Tyrosine-protein kinase, active site IPR011009:Protein kinase-like domain superfamily IPR017441:Protein kinase, ATP binding site IPR032675:Leucine-rich repeat domain superfamily |
| TraesCS7D02G542700 | TraesCS7D02G542700.1 | IPR002182:NB-ARC IPR027417:P-loop containing nucleoside triphosphate hydrolase IPR038005:Virus X resistance protein-like, coiled-coil domain IPR041118:Rx, N-terminal                                                                                                                                                                                                                                                                                                                                  |
| TraesCS7D02G543900 | TraesCS7D02G543900.1 | IPR002182:NB-ARC IPR027417:P-loop containing nucleoside triphosphate hydrolase IPR032675:Leucine-rich repeat domain superfamily IPR038005:Virus X resistance protein-like, coiled-coil domain IPR041118:Rx, N-terminal                                                                                                                                                                                                                                                                                 |
| TraesCS7D02G544100 | TraesCS7D02G544100.1 | IPR002182:NB-ARC IPR027417:P-loop containing nucleoside triphosphate hydrolase IPR027806:Harbinger transposase-derived nuclease domain IPR032675:Leucine-rich repeat domain superfamily IPR038005:Virus X resistance protein-like, coiled-coil domain IPR041118:Rx, N-terminal                                                                                                                                                                                                                         |
| TraesCS7D02G544300 | TraesCS7D02G544300.1 | IPR002182:NB-ARC IPR003591:Leucine-rich repeat, typical subtype IPR027417:P-loop containing nucleoside triphosphate hydrolase IPR027806:Harbinger transposase-derived nuclease domain IPR032675:Leucine-rich repeat domain superfamily IPR038005:Virus X resistance protein-like, coiled-coil domain IPR041118:Rx, N-terminal                                                                                                                                                                          |
| TraesCS7D02G544500 | TraesCS7D02G544500.1 | IPR002182:NB-ARC IPR027417:P-loop containing nucleoside triphosphate hydrolase IPR032675:Leucine-rich repeat domain superfamily IPR038005:Virus X resistance protein-like, coiled-coil domain IPR041118:Rx, N-terminal                                                                                                                                                                                                                                                                                 |
| TraesCS7D02G544600 | TraesCS7D02G544600.1 | IPR002182:NB-ARC IPR027417:P-loop containing nucleoside triphosphate hydrolase IPR032675:Leucine-rich repeat domain superfamily IPR038005:Virus X resistance protein-like, coiled-coil domain IPR041118:Rx, N-terminal                                                                                                                                                                                                                                                                                 |
| TraesCS7D02G546100 | TraesCS7D02G546100.1 | IPR002182:NB-ARC IPR003593:AAA+ ATPase domain IPR027417:P-loop containing nucleoside triphosphate hydrolase IPR032675:Leucine-rich repeat domain superfamily IPR041118:Rx, N-terminal                                                                                                                                                                                                                                                                                                                  |
| TraesCS7D02G546400 | TraesCS7D02G546400.1 | IPR002182:NB-ARC IPR003593:AAA+ ATPase domain IPR027417:P-loop containing nucleoside triphosphate hydrolase IPR032675:Leucine-rich repeat domain superfamily IPR041118:Rx, N-terminal                                                                                                                                                                                                                                                                                                                  |
| TraesCS7D02G546500 | TraesCS7D02G546500.1 | IPR002182:NB-ARC IPR003593:AAA+ ATPase domain IPR027417:P-loop containing nucleoside triphosphate hydrolase IPR041118:Rx, N-terminal                                                                                                                                                                                                                                                                                                                                                                   |

|                    |                      |                                 |                                                                                                                                                                                               |
|--------------------|----------------------|---------------------------------|-----------------------------------------------------------------------------------------------------------------------------------------------------------------------------------------------|
| TraesCS7D02G546800 | TraesCS7D02G546800.1 |                                 | IPR036047:F-box-like domain superfamily                                                                                                                                                       |
| TraesCS7D02G547100 | TraesCS7D02G547100.1 |                                 | IPR002182:NB-ARC IPR027417:P-loop containing nucleoside triphosphate hydrolase                                                                                                                |
| TraesCS7D02G548100 | TraesCS7D02G548100.1 |                                 | IPR032675:Leucine-rich repeat domain superfamily IPR038005:Virus X resistance protein-like, coiled-coil domain IPR041118:Rx, N-terminal                                                       |
| TraesCS7D02G549000 | TraesCS7D02G549000.1 |                                 | IPR002182:NB-ARC IPR027417:P-loop containing nucleoside triphosphate hydrolase                                                                                                                |
| TraesCS7D02G549200 | TraesCS7D02G549200.1 |                                 | IPR032675:Leucine-rich repeat domain superfamily IPR038005:Virus X resistance protein-like, coiled-coil domain IPR041118:Rx, N-terminal                                                       |
| TraesCS7D02G549500 | TraesCS7D02G549500.1 |                                 | IPR001611:Leucine-rich repeat IPR003591:Leucine-rich repeat, typical subtype IPR013210:Leucine-rich repeat-containing N-terminal, plant-type IPR032675:Leucine-rich repeat domain superfamily |
| TraesCS7D02G549700 | TraesCS7D02G549700.1 |                                 | IPR002182:NB-ARC IPR027417:P-loop containing nucleoside triphosphate hydrolase IPR038005:Virus X resistance protein-like, coiled-coil domain IPR041118:Rx, N-terminal                         |
| TraesCS7D02G550000 | TraesCS7D02G550000.1 |                                 | IPR032675:Leucine-rich repeat domain superfamily                                                                                                                                              |
| TraesCS7D02G550100 | TraesCS7D02G550100.1 | F-box domain-containing protein | IPR001611:Leucine-rich repeat IPR003591:Leucine-rich repeat, typical subtype IPR013210:Leucine-rich repeat-containing N-terminal, plant-type IPR032675:Leucine-rich repeat domain superfamily |
| TraesCS7D02G550300 | TraesCS7D02G550300.1 |                                 | IPR002182:NB-ARC IPR027417:P-loop containing nucleoside triphosphate hydrolase IPR038005:Virus X resistance protein-like, coiled-coil domain IPR041118:Rx, N-terminal                         |
| TraesCS7D02G550400 | TraesCS7D02G550400.1 |                                 | IPR036047:F-box-like domain superfamily                                                                                                                                                       |
| TraesCS7D02G551100 | TraesCS7D02G551100.1 |                                 | IPR001810:F-box domain IPR036047:F-box-like domain superfamily                                                                                                                                |

---
