# Supplementary material for: GWAS analysis reveals distinct pathogenicity profiles of Australian Parastagonospora nodorum isolates and identification of marker-trait-associations to septoria nodorum blotch
Source: PubMed Central journal article supplement (PMC8115087; doi:10.1038/s41598-021-87829-0), 2021-05-12
Supplement: 41598_2021_87829_MOESM4_ESM.pdf [file 41598_2021_87829_MOESM4_ESM.pdf]

**Supplemental Table S3: List of SnTox3 sensitive wheat lines carrying *Snn3-D1* locus.**

**GWAS analysis reveals distinct pathogenicity profiles of Australian *Parastagonospora nodorum* isolates and identification of marker-trait-associations to septoria nodorum blotch**

Huyen T.T Phan, Eiko Furuki, Lukas Hunziker, Kasia Rybak, Kar-Chun Tan

**Supplemental Table S3: List of wheat lines carrying *Snn3-D1* locus.**

| Collection     | Qcode       | Collection            | GID           | Pedigree                                                                                | synthetic wheat |
|----------------|-------------|-----------------------|---------------|-----------------------------------------------------------------------------------------|-----------------|
| CAIGE          | 115:ZWW11   | CAIGE 2013            | 6280103       | PBW343*2/KUKUNA//WBLL1*2/KUKUNA                                                         |                 |
|                | 121:ZWB11   | CAIGE 2013            | 6174903       | ALTAR 84/AE.SQUARROSA<br>(221)//3*BORL95/3/URES/JUN//KAUZ/4/WBLL1/5/MILAN/S87230//BAV92 | synthetic       |
|                | 124:ZWB11   | CAIGE 2013            | 6177148       | TRCH/6/HPO/TAN//VEE/3/2*PGO/4/MILAN/5/SSERI1                                            |                 |
|                | 126:ZWB11   | CAIGE 2013            | 6177174       | PFAU/SERI.1B//AMAD/3/WAXWING/6/HPO/TAN//VEE/3/2*PGO/4/MILAN/5/SSERI1                    |                 |
|                | 172:ZWB11   | CAIGE 2013            | 6175216       | WAXWING/4/BL 1496/MILAN/3/CROC_1/AE.SQUARROSA (205)//KAUZ/5/FRNCLN                      | synthetic       |
|                | 182:ZWB11   | CAIGE 2013            | 6175411       | WAXWING*2/HEILO                                                                         |                 |
|                | 24:ZIZ11    | CAIGE 2013            | 5755188       | SHA5//CARC/AUK/3/VEE#5//DOBUC'S'                                                        |                 |
|                | 34:ZWW11    | CAIGE 2013            | 6279212       | STYLET/4/SLVS/3/CROC_1/AE.SQUARROSA (224)//OPATA                                        | synthetic       |
|                | 45:ZIZ11    | CAIGE 2013            | 400002141     | GARIBE//TURACO/CHIL/3/KATILA-11                                                         |                 |
|                | 56:ZWB11    | CAIGE 2013            | 6176308       | ATTILA*2/PBW65*2//MURGA                                                                 |                 |
|                | 66:ZWB11    | CAIGE 2013            | 6176409       | ATTILA*2/PBW65*2//W485/HD29                                                             |                 |
|                | 71:ZIZ11    | CAIGE 2013            | 400002058     | HAALA-37                                                                                |                 |
|                | 80:ZWB11    | CAIGE 2013            | 6176558       | ATTILA*2/PBW65*2/4/BOW/NKT//CBRD/3/CBRD                                                 |                 |
|                | 95:ZWB11    | CAIGE 2013            | 6176914       | MUNAL #1/FRANCOLIN #1                                                                   |                 |
|                | 96:ZWB11    | CAIGE 2013            | 6177828       | FRNCLN/ROLF07                                                                           |                 |
| <b>Vavilov</b> | <b>Name</b> | <b>Year of collec</b> | <b>Origin</b> | <b>Status of accession</b>                                                              |                 |
|                | WLA-016     | -                     | -             | -                                                                                       |                 |
|                | WLA-304     | 1990                  | Russia        | Breeding line                                                                           |                 |
